# Supplementary material
Source: PubMed Central journal article supplement (PMC6583848)
Supplement: jamadermatol-154-725-s001.pdf [file jamadermatol-154-725-s001.pdf]

# Atorvastatin in active vitiligo: a bicentric prospective randomized trial

N°Etude :  
V0.3du 23/03/2015

## Investigateur principal :

Pr Thierry Passeron,  
Service de dermatologie,  
& INSERM U1065 équipe 12, C3M  
CHU de Nice,  
150, Route de Ginestière  
06200 Nice  
Tel : +33/492 039 224  
Fax : +33/492 036 560

## Investigateurs associés :

Pr Steven Thng  
Senior Consultant  
National Skin Centre  
1 Mandalay Road  
Singapore 308205

Dr Chuah Sai Yee, Associate Consultant,  
National Skin Centre  
Singapore

## Promoteur:

CHU de Nice  
Département de la Recherche Clinique et de l'Innovation  
Hôpital de Cimiez - 4, av Reine Victoria - BP1179  
06003 Nice cedex 01  
Tel: 04 92 03 40 11 – Fax: 04 92 03 40 75  
[drc@chu-nice.fr](mailto:drc@chu-nice.fr)

Pr PASSERON  
Investigateur Coordonnateur



Directeur du Département de la Recherche  
Clinique et de l'Innovation  
de la Recherche Clinique et de l'Innovation  
CHU de Nice

# TABLE OF CONTENTS

|                                                      |           |
|------------------------------------------------------|-----------|
| <b>1. BACKGROUND AND RATIONALE</b> .....             | <b>6</b>  |
| 1.1. GENERAL INTRODUCTION.....                       | 6         |
| <b>2. OBJECTIVES</b> .....                           | <b>7</b>  |
| 2.1. PRIMARY OBJECTIVE.....                          | 7         |
| 2.2. SECONDARY OBJECTIVES .....                      | 7         |
| <b>3. STUDY END POINTS</b> .....                     | <b>8</b>  |
| 3.1. PRIMARY END POINT: .....                        | 8         |
| 3.2. SECONDARY END POINTS:.....                      | 8         |
| <b>4. STUDY POPULATION</b> .....                     | <b>10</b> |
| 4.1. INCLUSION CRITERIA.....                         | 10        |
| 4.2. EXCLUSION CRITERIA.....                         | 10        |
| 4.3. WITHDRAWAL CRITERIA .....                       | 11        |
| 4.4. SUBJECT REPLACEMENT.....                        | 11        |
| 4.5. CALCULATION OF SAMPLE SIZE .....                | 12        |
| <b>5. TRIAL SCHEDULE</b> .....                       | <b>12</b> |
| <b>6. STUDY DESIGN</b> .....                         | <b>12</b> |
| <b>7. METHODS AND ASSESSMENTS</b> .....              | <b>12</b> |
| <b>8. RANDOMISATION AND BLINDING</b> .....           | <b>13</b> |
| 8.1. RANDOMISATION.....                              | 13        |
| 8.2. BLINDING .....                                  | 13        |
| <b>9. STUDY VISITS AND PROCEDURES</b> .....          | <b>14</b> |
| <b>10. TRIAL MATERIALS</b> .....                     | <b>16</b> |
| 10.1. TRIAL PRODUCT .....                            | 16        |
| 10.2. STORAGE AND DRUG ACCOUNTABILITY .....          | 17        |
| 10.3. STUDY DRUG FORMULATIONS .....                  | 17        |
| 10.4. STUDY DRUG ADMINISTRATION.....                 | 19        |
| 10.5. SPECIFIC RESTRICTIONS / REQUIREMENTS .....     | 19        |
| 10.6. CONCOMITANT THERAPY.....                       | 19        |
| <b>11. RISK / BENEFIT BALANCE</b> .....              | <b>19</b> |
| <b>12. DATA COLLECTION</b> .....                     | <b>20</b> |
| <b>13. STATISTICAL METHODS</b> .....                 | <b>21</b> |
| <b>14. ADVERSE EFFECTS</b> .....                     | <b>24</b> |
| <b>15. ETHICAL AND REGULATORY REQUIREMENTS</b> ..... | <b>25</b> |
| <b>16. PUBLICATIONS</b> .....                        | <b>28</b> |
| <b>17. REFERENCES</b> .....                          | <b>29</b> |

## Résumé

### Condition médicale et pathologie étudiée :

Vitiligo non segmentaire évolutif de l'adulte

### Rationnel de l'étude :

Le vitiligo est une dermatose relativement fréquente touchant environ 0,5% de la population. Il se manifeste par des macules dépigmentées acquises, bien limitées et asymptomatiques. Du fait de son caractère affichant, le vitiligo impacte significativement sur la qualité de vie des malades. La demande thérapeutique est ainsi souvent forte et ne doit pas être négligée. Malgré des progrès ces dernières années, les traitements sont encore loin d'être satisfaisants. La compréhension des mécanismes physiopathologiques intervenant dans la genèse du vitiligo s'affine. Le stress oxydatif et le système immunitaire y jouent un rôle certain. Récemment, le rôle de la cytokine CXCL10 et de son récepteur CXCR3 tous deux impliqués dans la voie de l'IFN $\gamma$  a été démontré dans un modèle murin de vitiligo. De plus, il a également été prouvé que l'expression de CXCL10 est augmentée dans la peau et le sérum des patients atteints de vitiligo. Le CXCR3 est lui exprimé sur les cellules T pathogènes.

Des études ultérieures ont rapporté les effets anti-inflammatoires, immunomodulateurs et antioxydants des statines. Les statines inhibent le chimiotactisme des leucocytes, la présentation d'antigène, l'activation lymphocytaire et la prolifération et de l'expression des cytokines (et notamment CXCR3 et CXCL10). Ainsi, ces agents pourraient être utiles dans le traitement du vitiligo évolutif.

Nous formulons l'hypothèse qu'un traitement par atorvastatine combiné à la photothérapie UVB serait plus efficace qu'un traitement par photothérapie UVB seule dans le traitement du vitiligo évolutif.

### Objectif principal et objectifs secondaires :

*Objectif principal :* Evaluer l'efficacité d'un traitement journalier par atorvastatine à 80mg associé à une photothérapie UVB vs photothérapie UVB seule dans le vitiligo évolutif après 6 mois de traitement.

*Objectifs secondaires :* Evaluer l'impact d'un traitement journalier par atorvastatine 80 mg sur la qualité de vie des patients atteints de vitiligo. Etudier la survenue d'éventuels effets indésirables secondaires à un traitement par atorvastatine forte dose. Etudier l'évolution sous traitement des taux plasmatiques de CXCL10 dans les 2 groupes.

### Population :

Patients de 18 à 75 ans ayant un vitiligo non segmentaire actif défini par l'apparition de nouvelles plaques ou l'extension des plaques existantes dans les 3 derniers mois avec par ailleurs en lumière de Wood un aspect hypochromique des bords et/ou une hypopigmentation périfolliculaire.

### Durée de l'étude :

Période d'inclusion : 12 mois

Durée du traitement : 6 mois

Analyses statistiques et écriture du manuscrit : 6 mois

Durée totale de l'étude : 24 mois

Méthodologie :

Etude interventionnelle bicentrique prospective randomisée avec évaluation en insu du traitement reçu.

Critères d'inclusion :

Patients de 18 à 75 ans ayant un vitiligo non segmentaire avec nouvelles plaques ou extension des plaques existantes dans les 3 derniers mois avec en lumière de Wood un aspect hypochromique et/ou une hypopigmentation périfolliculaire nécessitant un traitement par des séances d'UVB. Pour les femmes en âges de procréer une contraception efficace est obligatoire.

Critères de non-inclusion :

- Vitiligo segmentaire ou à composante segmentaire
- Allergie aux statines
- Traitement par statine ou fibrate pour une indication cardiovasculaire
- Traitement contre-indiqué avec l'atorvastatine
- Traitement du vitiligo par topiques et/ou photothérapie durant les 4 dernières semaines
- Traitement immunosuppresseur durant les 4 dernières semaines
- Prise de statine durant les 8 dernières semaines
- Pathologie hépatique avec ou sans insuffisance hépatique
- Insuffisance rénale
- Antécédent personnel ou familial de myopathie
- Antécédent personnel de rhabdomyolyse ou élévation du taux de CPK
- Ethyliste chronique ou toxicomanie
- Hypothyroïdie non traitée
- Antécédent de cancer cutané
- Patient jugé non compliant
- Patient participant à une autre étude clinique
- Toute autre constatation clinique qui, pour l'investigateur principal, pourrait interférer avec les résultats de l'étude ou poser un risque pour le patient durant l'étude.
- Personnes vulnérables : femmes enceintes ou allaitantes (un test de grossesse urinaire sera réalisé), mineurs, majeurs sous tutelles ou curatelles, privée de liberté

Déroulement de l'étude :

**VO : Visite de sélection.** Information du patient, vérification des critères d'inclusion et de non inclusion. Recueil du consentement éclairé. Randomisation dans les deux groupes. Recueil des données démographiques, antécédents, traitements en cours. Un bilan biologique initial sera fait (transaminases, créatinémie, urée, TSH, CPK, cholestérol total, HDL, LDL, triglycérides, VHB) ainsi qu'un test urinaire de grossesse pour les femmes en âge de procréer.

**V1 : Visite d'Inclusion et début du traitement.** Après un délai minimum de 7 jours, les patients débuteront l'étude. Une première évaluation clinique du vitiligo avec réalisation de photographies standardisées. Réalisation du DLQI. La photothérapie UVB consistera en 2 séances par semaine. L'atorvastatine sera débutée à 40 mg par jour.

**V2 : Visite de suivi à 1 mois.** La dose d'atorvastatine sera augmentée à 80 mg par jour en cas de bonne tolérance clinique, d'absence d'interactions médicamenteuses, et biologique (transaminases, cholestérol total, HDL, LDL, triglycéridémie, créatininémie, CPK normaux). Dosage du CXCL10 sérique.

**V3 : Visite de suivi à 3 mois.** Une évaluation du vitiligo avec photographies standardisées. Réalisation du DLQI. La tolérance clinique et biologique sera évaluée par recueil des effets indésirables et tests sanguins (transaminases, cholestérol total, HDL, LDL, triglycéridémie, créatininémie, CPK normaux). Dosage du CXCL10 sérique.

**V4 : Visite de fin d'étude.** Une évaluation du vitiligo avec photographies standardisées. Réalisation du DLQI. La tolérance clinique et biologique sera évaluée par recueil des effets indésirables et tests sanguins (transaminases, cholestérol total, HDL, LDL, triglycéridémie, créatininémie, CPK normaux).  
Après la fin de l'étude les patients seront pris en charge selon les modalités habituelles de soins recommandées pour leur pathologie.

Durant toute l'étude, si les transaminases augmentent à plus de 3N, l'atorvastatine sera stoppée. Si les transaminases augmentent mais restent à moins de 3N, des contrôles répétés tous les 7 jours seront fait jusqu'à normalisation.

Si le patient présente des symptômes musculaires avec ou sans élévation des CPK et si il présente une élévation des CPK à 5N ou plus, l'atorvastatine sera stoppée et la photothérapie UVB seule sera continuée.

Critères d'évaluation :

*Critère d'évaluation principal :* Diminution du score VASI exprimé en pourcentage.

*Critères secondaires :* Diminution du score VETF exprimé en pourcentage. Variation du score DLQI et PGA. Tolérance clinique et biologique de l'atorvastatine. Variation du taux de CXCL10 sérique.

Nombre de sujets :

Si l'on considère qu'une amélioration du VASI de 20 % se produira dans le bras photothérapie UVB seule contre 50 % dans le bras photothérapie UVB et atorvastatine, une population de 14 patients par bras sera nécessaire (en prenant en compte 20% de patients perdus de vue). Le nombre total de patients à inclure pour l'étude sera de 28.

# STUDY PROTOCOL

## 1. BACKGROUND AND RATIONALE

### 1.1. General Introduction

Vitiligo is a depigmentation disorder affecting 0.5 to 2% of the general population. It is an acquired pigmentary disorder of the skin and mucous membranes that is characterized by circumscribed, depigmented macules and patches. There are strong evidences for a role of both oxidative stress and immune system in genetically predisposed individuals <sup>[1-5]</sup>. Recently, the role of CXCL10, CXCR3, its receptor, and the IFN $\gamma$  pathway was demonstrated in vitiligo mice model <sup>[6, 7]</sup>. By targeting CXCL10 using antibodies the authors managed to prevent the depigmentation in the mice. The increased expression of CXCL10 was also found to be up-regulated in vitiligo skin. These data emphasized the potential usefulness of targeting the immune system in general and more specifically CXCR3/CXCL10 to halt vitiligo progression.

Many treatment modalities are currently used for vitiligo, such as topical steroids, topical immunomodulators, topical calcipotriol and phototherapy <sup>[8]</sup>. In patients with stable vitiligo, surgical methods can be alternative therapeutic options. However, for unstable, rapidly progressive vitiligo, no treatment demonstrates so far any efficacy in a comparative prospective trial. Oral systemic steroid either taken in the form of reducing dose or mini-pulse therapy can be proposed. Due to its potential side effects, this treatment regimen remains controversial <sup>[9]</sup>. Narrowband UVB (Nb-UVB) can also be proposed. It promotes repigmentation by inducing the differentiation and the proliferation of melanocytes progenitors. Moreover its systemic immunosuppressive effects can be beneficial for halting the immune destruction of melanocytes. Unfortunately, these approaches are far to give satisfactory results.

The 3-hydroxy-3-methylglutaryl coenzyme A (HMG-CoA) reductase inhibitors (statins), which include atorvastatin, cerivastatin, fluvastatin, pravastatin, lovastatin and simvastatin; are used widely as lipid-lowering agents to reduce atherogenesis and cardiovascular morbidity. The statins were first reported by Noël M et al. in a case report to be effective in the regression of vitiligo in a patient who was incidentally started on high dose simvastatin 80mg a day, following myocardial infarct. <sup>[10]</sup> Subsequent studies have reported the anti-inflammatory, immunomodulatory and anti-oxidant effects of statins. Statins inhibit the expression of intercellular adhesion molecule-1 (ICAM-1), lymphocyte function-associated antigen (LFA)-1 (CD11a/CD18), and monocyte chemoattractant protein-1 (MCP-1) (CD11b/CD18) on leukocytes and endothelial cells, and interfere with LFA-1–ICAM-1 interaction through binding to LFA-1, thereby suppressing leukocyte infiltration into the inflammatory sites. As the interaction between LFA-1 (of lymphocytes) and ICAM-1 (of antigen presenting cells) is essential for antigen presentation, statins suppress not only antigen presentation but also activation of lymphocytes. The inhibitory effect of statin on the expression

of major histocompatibility complex (MHC) class II contributes further to this effect.<sup>[12-13]</sup> Atorvastatin is a more potent lipid lowering agent compared to simvastatin and is a potent inhibitor of inducible MHC class II expression.<sup>[12,14]</sup> Statins also significantly downregulate the expression of Th1-type chemokine receptors, CCR5 and CXCR3, on T cells and inhibit the chemokine release by endothelial cells.<sup>4</sup> Given the ability of statins to inhibit leucocyte chemotaxis, antigen presentation, lymphocyte activation and proliferation and cytokine expression (including CXR3 and CXCL10), and also in view of their safety and inexpensiveness, these agents may be useful in the treatment of active progressive vitiligo.

Oral atorvastatin is an ANSM approved lipid lowering agent given at a dose range between 10 to 80 mg daily. The lipid lowering effect and oxidative stress effects are dose dependent.<sup>[14,15]</sup> At the contrary of the treatment for lipid lowering that is recommended to start at 10mg/d and then, if needed, progressively to increase the doses up to 80mg/d, the pharmacological studies and the previous cases reports strongly suggest that a high dose of oral atorvastatin (80mg/d) is required for inducing a potent inhibition of the immune reaction.<sup>[10,12,13,15]</sup> The use of atorvastatin at low dose appears thus useless for acting on the immune system.

We hypothesize that atorvastatin will halt the immune reaction against melanocyte and thus, when used in combination with NB-UVB phototherapy will be more effective than NB-UVB phototherapy alone in the treatment of active vitiligo with minimal adverse effects, and hence, improving the QOL of patients. We decided to start the treatment for the first month at 40mg/d which is a suboptimal dose for acting on the immune system but that will allow us to evaluate the clinical and biological tolerance of atorvastatin in the treated patients, before increasing the required dose of 80mg/d.

In this study, we aim to evaluate the efficacy of combination of atorvastatin 80mg daily and Nb-UVB phototherapy versus Nb-UVB phototherapy alone in the treatment of active vitiligo.

## **2. OBJECTIVES**

### **2.1. Primary Objective**

To compare the efficacy of combination of atorvastatin 80mg daily and Nb-UVB phototherapy versus Nb-UVB phototherapy alone in the treatment of active vitiligo after 6 months of treatment.

### **2.2. Secondary Objectives**

1. To compare the efficacy of combination of atorvastatin 80mg daily and Nb-UVB phototherapy versus Nb-UVB phototherapy alone in the treatment of active vitiligo after 6 months of treatment using the VETF score
2. To compare the efficacy of combination of atorvastatin 80mg daily and Nb-UVB

phototherapy versus Nb-UVB phototherapy alone in the treatment of active vitiligo after 6 months of treatment using the PGA assessment

3. To compare the evolution, from baseline to 6 months, of the quality of life (QOL) between both groups of patients with active vitiligo.
4. To study the potential adverse effects in both arms. A focus will be done on the side-effects expected using atorvastatin.
5. To compare the evolution, from baseline to 6 months, of CXCL10 serum levels between both groups of patients with active vitiligo.
6. To describe in both groups the evolution (baseline, M3, M6) of all parameters presented above

### **3. STUDY END POINTS**

#### **3.1. Primary end point:**

1. Percentage of decrease in Vitiligo Area Scoring Index (VASI) score (Annex 1) between baseline and 6 months after commencement of the study. In the VASI assessment, the body is separated into five sites: hands, upper extremities, trunk, lower extremities and feet. The extent of residual depigmentation is expressed by the following percentages: 0, 10%, 25%, 50%, 75%, 90%, or 100%. The VASI score is then derived by multiplying the values assessed for the vitiligo involvement by the percentage of affected skin for each body site and summing the surface of the lesions of all body sites together.

#### **3.2. Secondary end points:**

1. Percentage of decrease in Vitiligo European Task Score (VETF) score (Annex 2) between baseline and 6 months after commencement of the study.

The VETF proposed a system that combines analysis of extent, stage of disease (staging), and disease progression (spreading) for each of the five sites previously described.

- Staging:

- Stage 0: normal pigmentation (no depigmentation in area graded),
- Stage 1: incomplete depigmentation (including spotty depigmentation, trichrome, and homogeneous lighter pigmentation)
- Stage 2: complete depigmentation (may include hair whitening in a minority of hairs, <30%)
- Stage 3: complete depigmentation plus significant hair whitening (>30%).

The final staging score is the sum of the five sites scores.

- Spreading:

- +1: progressive



- 0: stable
- -1: regressive

(Spreading is assessed by combining Wood's lamp and electric light examinations in a dark room. Wood's lamp includes a magnifying lens to assess hairs, especially vellus hairs).

The final spreading score is the sum of the five sites scores.

Final VETF score is the sum of the staging and spreading scores (/25).

2. Physician global assessment (PGA). Treatment response will be graded as excellent (76 – 100%), moderate (51 – 75%), Mild (26 - 50%), minimal (1 – 25%) or no response.
3. Dermatology Life Quality Index (DLQI) score (Annex 3) is an autoquestionnaire validated in the frame of dermatological clinical research. A French version is validated<sup>[16]</sup>
4. Description of potential side effects using clinical evaluation and biology. Clinical and biological tolerability of high dose of oral atorvastatin will be recorded.

The known adverse effects of oral atorvastatin are:

- Digestive adverse effects: nausea, vomiting, abdominal pain, diarrhoea,
- lethargy,
- Muscular adverse effects: myalgia, rhabdomyolysis,
- Hepatic adverse effects: abnormal liver function test (transaminitis).
- interstitial pulmonary infiltrate
- · sentimentality,
- · sleeping disorders,
- · gynecomastia
- hyperglycemia

The less common side effects include rash, eczema, linear IgA bullous dermatoses, toxic epidermal necrolysis and alopecia.

Bloods will be screened at baseline, 1 month, 3 months and 6 months after commencement of the study. Biological side effects will be defined as a blood measurement > 2X the normal lab value.

- baseline: Liver enzymes (AST, ALT, GGT), creatinine, uric acid, TSH, creatinine kinase (CK), total cholesterol, HDL, LDL, triglycerides, Hepatitis B screening (HepBsAg, anti-HepBsAb).
- 1 month: Subjects will be started on oral atorvastatin 40mg daily initially for 1 month, and if tolerated, the dose will be escalated to 80mg daily. These bloods will be screened again at 1 month: (Liver enzymes (AST, ALT, GGT), total cholesterol, HDL, LDL, triglycerides, creatinine kinase).
- 3 months: Liver enzymes (AST, ALT, GGT) and creatinine kinase (CK).
- 6 months: (Liver enzymes (AST, ALT, GGT), total cholesterol, HDL, LDL, triglycerides,

creatinine kinase).

The known side-effects of Nb-UVB are erythema and blisters if too high doses are used.

5. CXCL10 serum levels will be measured using ELISA method after blood centrifugation.
6. The evolution of all the secondary endpoints will be described using baseline, M3 and M6 values. Endpoints are considered as detailed above.

#### **4. STUDY POPULATION**

Patients with active non-segmental vitiligo from Department of Dermatology, University Hospital of Nice, France and from National Skin Centre, Singapore will be recruited into the study.

##### **4.1. Inclusion Criteria**

The inclusion criteria would be:

- a. patients aged 18 to 75 years
  - b. Active non-segmental vitiligo defined by
    - Non-segmental vitiligo with new patches or extension of old lesions during the last 3 months
- AND
- Presence of hypochromic aspect under Wood's lamp examination and/or perifollicular hypopigmentation under Wood's lamp examination
- c. Patient requiring a treatment by UVB
  - d. Use of a means of contraception for the women old enough to procreate Signed informed consent document
  - e. Patient registered to the French Social Security

##### **4.2. Exclusion Criteria**

Provide a statement that all subjects meeting any of the exclusion criteria at baseline will be excluded from participation and then list the criterion.

The exclusion criteria would include:-

- a. Segmental or mixed vitiligo

- b. Pregnant (urinary pregnancy test will be done) or lactating patients or not using effective contraception
- c. Allergy to statin medications
- d. Use of statin or fibrate medications due to cardiac risks
- e. Use of statin medications in the past 8 weeks
- f. Use of any medications contraindicated with use of statin medications
- g. Use of vitiligo treatments (both topicals and phototherapy) in the past 4 weeks
- h. Treatment with immunomodulating oral medications in the past 4 weeks
- i. Hepatic disease and/or dysfunction
- j. Renal dysfunction
- k. Personal or familial history of myopathy or personal history of rhabdomyolysis or elevated baseline creatinine kinase
- l. Alcohol or drug abuse
- m. Untreated hypothyroidism
- n. Personal history of skin cancer
- o. Any other clinically significant findings that, in the opinion of the Principal Investigator, might interfere with study evaluations or pose a risk to subject safety during the study.
- p. Patients assessed to be uncooperative
- q. Participants in other clinical studies

#### **4.3. Withdrawal Criteria**

- The subject has the right to withdraw from the study at any time.
- The subject will be withdrawn from the study should any of the following arise.
  - o In the investigator's judgment, it is in the subject's best interest.
  - o The subject withdraws consent.
- If the subject has been enrolled into the study but is found in violation of the protocol selection criteria, this should be discussed with the trial sponsor on a case by case basis. They may be required to withdraw from the study.

If a subject withdraws from the study, they should be encouraged to spontaneously report any adverse events that they have experienced. If no information is spontaneously received from the subject, every effort should be made to collect information regarding any adverse events experienced.

#### **4.4. Subject Replacement**

Drop-outs, after being randomized to the study (including patients who withdraw, are withdrawn or are lost to follow up), will not be replaced.

#### **4.5. Calculation of sample size**

Considering the results of a previous study, we anticipate, in these active forms of vitiligos, a maximum of 20% improvement of VASI score in the UVB arm alone<sup>[17]</sup>. We hypothesized a 50% improvement in the UVB therapy and atorvastatin arm corresponding to a clinically relevant improvement. Assuming a standard deviation of 20, a power of 90% and an alpha risk of 5%, 14 patients per arm will be necessary (allowing for a 20% rate of early study termination or loss to follow-up). A total of 28 subjects with active non-segmental vitiligo who meet the inclusion and exclusion criteria will be recruited for the study. The two centers are specialized and well-recognized centers for vitiligo. More than 300 new outpatients are seen every year in each of these centers. Considering that only very active vitiligo will be included, this represent about 10% of the cases. The feasibility is though excellent.

#### **5. TRIAL SCHEDULE**

Inclusion: 1 year

Length of participation for each patient: 6 months

Analysis of the results and drafting manuscript: 6 months

Total duration of the study: 24 months

#### **6. STUDY DESIGN**

This is an interventional bicentric prospective randomized open study with blinded evaluation, falling within the ambit of the “loi du 09 août 2004” of the “Code de la Santé Publique”.

After the patients have been screened for study eligibility, those who have understood and signed on the informed consent will be enrolled into the study.

Enrolled patients will be randomized into group A or B:

- Group A will be treated with the combination of oral atorvastatin and NB-UVB phototherapy twice a week for 6 months. The initial starting dose of the oral atorvastatin will be 40mg daily and after 1 month, if tolerated clinically and biologically following blood tests, the dose will be increased to 80mg daily.
- Group B will be receiving only NB-UVB phototherapy twice a week for 6 months.

The center of Singapore will submit the protocol to its local ethical committee and will its own necessary funding.

#### **7. METHODS AND ASSESSMENTS**

- Photographic documentation
  - Standardized photographic documentation will be performed at first clinical consult (baseline), 3 months and 6 months after commencement of the study.
  - Images will be taken with standardized camera settings and standardized positioning of the subject. (Cf. Annex 5)
- The efficacy end points, VASI, VETF and PGA scores, will be measured on these standardized pictures by 3 dermatologists blinded to the treatment received (Annexes1 and 2). For VASI and VETF a mean value will be calculated for each patient based on these 3 measurements. For the PGA categories, in case of disagreement, the category chosen by two of the dermatologist will be selected. In case of the dermatologists assessed the PGA in 3 different categories, a second evaluation will be performed with the 3 dermatologists together to find a consensus.
- The CXCL10 levels will be measured in the laboratory of Pr Passeron in INSERM U1065, team 12, C3M, Nice, France. Samples from the Singapore center will be kept at -80°C in this center and sent at the end of the study to the C3M laboratory by specialized transporter. Blood samples of patients at baseline, and after 3 and 6 months of treatment will be analysed. Serum will be extracted using blood centrifugation and kept at -80°C. They will be sent to the laboratory by special transport at the end of the study. The samples will be destroyed after analysis and no collection will be kept.

## **8. RANDOMISATION AND BLINDING**

### **8.1. Randomisation**

Participants will be randomly allocated to one of two treatment arms:

- group A: atorvastatin and NB-UVB phototherapy,
- group B: NB-UVB phototherapy only.

Randomization will be balanced (1:1) and stratified by centre. Centralized block randomization will be conducted by the Département de la Recherche Clinique et de l'Innovation (DRCI) (Department of Clinical Research and Innovation) at CHU Nice (Nice University Hospital) using Nquery© Advisor v 7.0. software. Two randomization lists will therefore be constructed.

The investigator in each centre, having obtained written informed consent, and verified the selection criteria, will proceed to randomization. The investigator will submit the randomization form by fax (or e-mail), with all necessary information, to the methodological centre (DRCI). A fax (or e-mail) will be returned with a study inclusion number and the arm to which the patient has been allocated.

### **8.2. Blinding**

Due to the fact that oral atorvastatin needs to be prescribed and subjects will need to swallow the medications daily, both the investigators and the subjects will not be blinded.

However, the 3 dermatologists in charge of endpoints evaluation will be blinded during the global photography assessment. VASI and VETF scoring and the objective assessment of degree of improvement will be performed at baseline, 12 weeks and 24 weeks.

## 9. STUDY VISITS AND PROCEDURES

### *a. Screening Visits and Procedures*

Please refer to the flow-chart for summarised version of visit details (Annex 4)

#### ***Recruitment of the patients***

Dermatologist who usually follows vitiligo patients will select them in a consecutive manner according to the criteria mentioned above. If a patient fits with the selection criteria his dermatologist will inform him of the study and if the patient agrees, he will refer the patient to the investigator of the study. Patients of the active list of each center will be also contacted to be proposed to be included in the study. The French association of vitiligo patients will be informed of the study. Patient of this association, interested in the study, will be examined by the investigator to assess their eligibility.

The patients will be advised verbally and also presented with written information about the study, by the dermatologist investigator. Patients who wish to avail themselves of a period of reflexion before signing the informed consent form may do so, and be given an appointment for the screening visit in any case (V0). Patients who choose to sign the consent form on the day of the selection visit, may have their inclusion appointment on the same day.

#### ***Visit 0 – Screening Visit***

- Collection of signed consent form
- Urinary pregnancy test in women of childbearing age
- Randomization in the Group A or B by central randomization
- Demographic data (age, gender, ethnic)
- Patient history (duration of vitiligo and any other associated skin conditions)
- Prior and current treatment including over-the-counter preparations
- Inclusion and exclusion criteria ascertain
- Baseline blood tests: Liver enzymes (AST, ALT, GGT), creatinine, uric acid, TSH, creatinine kinase (CK), total cholesterol, HDL, LDL, triglycerides, Hepatitis B screening (HepBsAg, anti-

HepBsAb).

- Serum CXCL10 level

### **Visit 1 – Day 1**

- Initial clinical evaluation of vitiligo with baseline:

- Standardized clinical photographs
- DLQI

- NB-UVB phototherapy will be done as usually performed in standard care of such patients. It will consist of 2 sessions per week for 6 months and will be performed by the dermatologist who usually follows the patient
- Oral atorvastatin will be started at 40mg daily. It will be dispensed by the pharmacy of the hospital

### **Visit 2 – 1 month**

- Oral atorvastatin will be increased to 80mg daily after 1 month if clinically tolerated with no adverse effects and if these bloods screened at 1 month: (Liver enzymes (AST, ALT, GGT), total cholesterol, HDL, LDL, triglycerides, creatinine kinase) are normal (i.e in the range of the lab normal values).
- 

### **Visit 3 – 3 months**

- Follow-up visit 3 months after starting treatment.
- Evaluation of the evolution of vitiligo with standardized clinical photographs
- Evaluation of improvement of QOL will be done by patients using DLQI.
- Evaluation of clinical and biological tolerability of atorvastatin.
- All adverse effects will be recorded
- Bloods will be done: Liver enzymes (AST, ALT, GGT) and creatinine kinase (CK)
- Serum CXCL10 level

- **Final study visit: Visit 4 – 6 months**

- Evaluation of the evolution of vitiligo with standardized clinical photographs.
- Evaluation of improvement of QOL will be done by patients using DLQI.
- Evaluation of clinical and biological tolerability of atorvastatin.
  - All adverse effects will be recorded
  - Bloods will be done: Liver enzymes (AST, ALT, GGT), total cholesterol, HDL, LDL, triglycerides, creatinine kinase

- Serum CXCL10 level

Throughout the study, if the liver enzymes showed transaminitis with increment of up to 3 folds of normal range, oral atorvastatin will be stopped. However, if the transaminitis increase less than 3 folds of normal range, repeat liver enzymes (AST, ALT, GGT) blood test will be done every 7 days until they return to normal levels. If there is severe muscular symptoms with or without elevated CK and if there is muscular symptoms with 5 folds increase of CK level, oral atorvastatin will be stopped and only NB-UVB phototherapy will be continued.

- ***Post Study Follow up and Procedures***

- After the end of the study, patients will be treated as per routine protocol according to the institution.

- ***Discontinuation Visit and Procedures***

If a subject discontinues prematurely from the study, every effort should be made to obtain the following information which will be documented:

- Any adverse events (any untoward medical occurrence which differs from baseline or any concurrent signs or symptoms which are exacerbated).
- Concomitant medications.

In the event of patient withdrawing prematurely from the study, the reason for withdrawal should be documented in the CRF.

In case of a patient willing to stop his treatment or stopping the treatment for medical reasons (whatever the reason) every effort should be made to have the patient endpoints assessment, at least at M6. These results will be included in the ITT analysis.

## **10. TRIAL MATERIALS**

### **10.1. Trial Product**

Atorvastatin is in a class of medications called HMG-CoA reductase inhibitors (statins). It works by slowing the production of cholesterol in the body to decrease the amount of cholesterol that may build up on the walls of the arteries and block blood flow to the heart, brain, and other parts of the body. Atorvastatin is used together with diet, weight loss, and exercise to



reduce the risk of heart attack and stroke. Atorvastatin is also used to decrease the amount of fatty substances such as low-density lipoprotein (LDL) cholesterol and triglycerides in the blood and to increase the amount of high-density lipoprotein (HDL) cholesterol in the blood. Atorvastatin may also be used to decrease the amount of cholesterol and other fatty substances in the blood in children and teenagers 10 to 17 years of age who have familial heterozygous hypercholesterolemia (an inherited condition in which cholesterol cannot be removed from the body normally).

## 10.2. Storage and Drug Accountability

The atorvastatin tablets should be stored at room temperature, away from excess heat and moisture.

## 10.3. Study Drug Formulations

Tahor is a brand name of atorvastatin, approved by the FDA and the French Agency for Medicine (ANSM) in the following formulation(s): (Annex 6)

TAHOR (atorvastatin calcium - tablet;oral)

White, round, film-coated tablets

Manufacturer: PFIZER

Strength(s): EQ 10MG BASE [AB], EQ 20MG BASE [AB], EQ 40MG BASE [AB],EQ 80MG BASE [RLD] [AB]

A generic version of Tahor has been approved by the FDA. The following products are equivalent to Tahor and have been approved by the FDA: atorvastatin calcium tablet;oral

- Manufacturer: ACTAVIS

Strength(s): EQ 10MG BASE [AB], EQ 20MG BASE [AB], EQ 40MG BASE [AB]

- Manufacturer: ALMUS

Strength(s): EQ 10MG BASE [AB], EQ 20MG BASE [AB], EQ 40MG BASE [AB], EQ 80MG BASE [AB]

- Manufacturer: ALTER

Strength(s): EQ 10MG BASE [AB], EQ 20MG BASE [AB], EQ 40MG BASE [AB]

- Manufacturer: MYLAN

Strength(s): EQ 10MG BASE [AB], EQ 20MG BASE [AB], EQ 40MG BASE [AB], EQ 80MG BASE [AB]

- Manufacturer: ARROW

Strength(s): EQ 10MG BASE [AB], EQ 20MG BASE [AB], EQ 40MG BASE [AB], EQ 80MG BASE [AB]

- Manufacturer: SANDOZ  
Strength(s): EQ 10MG BASE [AB], EQ 20MG BASE [AB], EQ 40MG BASE [AB], EQ 80MG BASE [AB]
- Manufacturer: BGR  
Strength(s): EQ 10MG BASE [AB], EQ 20MG BASE [AB], EQ 40MG BASE [AB], EQ 80MG BASE [AB]
- Manufacturer: BLUEFISH  
Strength(s): EQ 10MG BASE [AB], EQ 20MG BASE [AB], EQ 40MG BASE [AB], EQ 80MG BASE [AB]
- Manufacturer: CRISTERS  
Strength(s): EQ 10MG BASE [AB], EQ 20MG BASE [AB], EQ 40MG BASE [AB], EQ 80MG BASE [AB]
- Manufacturer: EG  
Strength(s): EQ 10MG BASE [AB], EQ 20MG BASE [AB], EQ 40MG BASE [AB], EQ 80MG BASE [AB]
- Manufacturer: EVOLUGEN  
Strength(s): EQ 10MG BASE [AB], EQ 20MG BASE [AB], EQ 40MG BASE [AB], EQ 80MG BASE [AB]
- Manufacturer: ISOMED  
Strength(s): EQ 10MG BASE [AB], EQ 20MG BASE [AB], EQ 40MG BASE [AB], EQ 80MG BASE [AB]
- Manufacturer: KRKA  
Strength(s): EQ 10MG BASE [AB], EQ 20MG BASE [AB], EQ 40MG BASE [AB], EQ 80MG BASE [AB]
- Manufacturer: PHR LAB  
Strength(s): EQ 10MG BASE [AB], EQ 20MG BASE [AB], EQ 40MG BASE [AB], EQ 80MG BASE [AB]
- Manufacturer: RATIO  
Strength(s): EQ 10MG BASE [AB], EQ 20MG BASE [AB], EQ 40MG BASE [AB], EQ 80MG BASE [AB]
- Manufacturer: RPG  
Strength(s): EQ 10MG BASE [AB], EQ 20MG BASE [AB], EQ 40MG BASE [AB]
- Manufacturer: RANBAXY PHARMACIE GENERIQUES  
Strength(s): EQ 80MG BASE [AB]
- Manufacturer: TEVA SANTE  
Strength(s): EQ 10MG BASE [AB], EQ 20MG BASE [AB], EQ 40MG BASE [AB], EQ 80MG BASE [AB]
- Manufacturer: ZENTIVA LAB  
Strength(s): EQ 10MG BASE [AB], EQ 20MG BASE [AB], EQ 40MG BASE [AB], EQ 80MG BASE [AB]

- Manufacturer: ZYDUS
- Strength(s): EQ 10MG BASE [AB], EQ 20MG BASE [AB], EQ 40MG BASE [AB], EQ 80MG BASE [AB]

#### **10.4. Study Drug Administration**

Atorvastatin can be administered as a single dose at any time of the day, with or without food. Do not break the tablet before taking.

#### **10.5. Specific Restrictions / Requirements**

All patients would also be

- a. Has active non-segmental vitiligo
- b. Willing and able to comply with scheduled visits
- c. Willing to start on oral atorvastatin if randomized into Group A
- d. Willing to allow photographs, blood tests and to do DLQI at scheduled visits

#### **10.6. Concomitant therapy**

All medications (prescription and over the counter), vitamin and mineral supplements, and / or herbs taken by the participant should be documented.

#### **10.7. Etiquette**

The labeling of products will be in compliance with Articles R522 and R5123 of the Public health code. It is necessary to join in appendix a model of containing label:

- the name of the Promoter and his address,
- the reference of the current try,
- the reference allowing to know their complete formula, their number of lot of manufacturing, their best before date
- indications necessary for the good preservation
- following registration inscription " use under strict medical supervision "

### **11. RISK / BENEFIT BALANCE**

#### ***\_ Benefits for the patient***

If our hypothesis is confirmed, the ones who will receive the atorvastatin can expect to have an additive reduction of their vitiligo activity compare to the gold standard treatment, Nb-UVB.

#### ***\_ Collective benefits***

There is so far no treatment that has been proven to halt or decrease the evolutivity of vitiligo. If our hypothesis is confirmed, patients with active vitiligo could benefit of the first effective approach to reduce the activity of their disease.

### ***\_ Risk and restrictions***

Nb-UVB is one of the gold standard treatment for non-segmental vitiligo. On active forms its action is really interesting that in top of promoting repigmentation its systemic immunosuppressive action can have beneficial effect on the evolutivity of vitiligo. In this study patients in both groups will benefit from this treatment so no chance loss is expected. Atorvastatine is widely used for years for treating hypercholesterolemia. The more frequent side-effects are muscular pain and liver cytolysis. These side-effects are easily monitored clinically and with biology. Rarely, allergy, abdominal pain, gain of weight, pulmonary interstitial infiltrate, sentimentality, sleeping disorders, gynecomastia, hyperglycemia can be observed.

UVB phototherapy can induce transient erythema or superficial actinic burns.

Tahor is contra indicated during pregnancy. The safety of takin atorvastatin during pregnancy is not established. No clinical trial using atorvastatin has been performed in pregnant women. Only rare cases of congenital abnormalities have been reported after intra-uterine exposure to inhibitors of HMG-CoA reductase. Animal studies have shown a toxicity on reproduction.

The treatment of a mother with atorvastatin can decrease the foetal level of mevalonate which is a precursor of the cholesterol biosynthesis.

For these reason Tahor should not be used during pregnancy, or in a woman considering a pregnancy or suspecting of being pregnant.

Effective contraception will thus be required during the study. Moreover the patients will have to go to the investigation center 4 times during the study.

### ***\_ Synthesis***

Side-effects of the treatments used in this study are well-known and limited. Vitiligo strongly affects the quality of life and therapeutic resources are very limited and poorly effective to halt the progression of the disease. The benefits of this study seem higher than the risks.

## **12. DATA COLLECTION**

### **Observation records**

A specific observation record will be designed to collect data for the study. The Clinical Research

Associate responsible for the promotion of the study and the Data Manager of the DRCI, will design the observation record in coordination with, and under the responsibility of, the principal investigator.

Data quality control will be performed on the observation records by the sponsor during the planned monitoring visits by the Clinical Research Associate of the Department of Clinical Research and Innovation.

## **Database**

A database dedicated to study data collection will be designed using the OpenClinica® software by the Data Manager at the DCRI based on the finalized clinical observation records. Parameter specification and the implementation of the database for data collection, including user training, will be the responsibility of the DCRI.

The investigators in each centre will take responsibility for data collection in the observation records. The study data will be entered in the database by the clinical research associate dedicated to this study at the Nice coordinating centre. The data will be protected by the creation of specific access rights according to study role.

## **Data quality control**

Once the final data have been entered, checks for their validity and coherence will be performed by the Data Manager of the Department of Clinical Research and Innovation and requests for verification issued.

Throughout the study, any modifications to the database will be recorded, enabling a full audit trail.

At the end of the quality control process, the database will be frozen and signed off by the principal investigator, the data manager and the responsible doctor at the Department of Clinical Research and Innovation. No modification of the data will be possible after this time.

The frozen database, together with the Data Management report, will be transferred to the statistician for analysis.

## **13. STATISTICAL METHODS**

### **Analysis strategy :**

Population analysed:

The study patients will be analysed according to the intention to treat principle (ITT). Each patient

will be analysed as a part of the group to which he or she was assigned at randomization.

A per protocol analysis will also be performed (PP) including patients without deviations from study protocol.

A sensitivity analysis that includes subjects with active non-segmental vitiligo who meet the study selection criteria, start on the randomised study treatment, and have the baseline assessments and at least one post-treatment assessment done, without major deviation from the protocol requirements (less than 80% of UVB sessions and more than a total of 10 days (consecutive or not) without atorvastatin treatment will be considered as major deviation).

The results of these two last analyses cannot be substituted for those of the intention to treat analysis.

Missing data:

The “last observation carried forward” (LOCF) strategy will be used to impute the missing data: all endpoints will be measured at baseline, M3 and M6. If missing, the M6 value will be replaced by the M3. If M3 is missing as well, the endpoint value will be considered as baseline (no evolution).

Adjustment:

The comparisons will be adjusted in the first instance on the centre, being a parameter of stratification of the randomization. With the aim of taking into account the confounding factors that may persist despite the randomization (a clinical, not statistical difference between the groups) the adjustment may be completed by the known or suspected factors influencing vitiligo evolution.

The statistical analysis will be performed by a biostatistician of the Department of Clinical Research and Innovation at Nice. Before each analysis is performed the conditions for the application of the tests used will be verified. The various tests will be considered significant at a threshold of 5% (unless otherwise specified). The statistical analysis will be performed using SAS Enterprise Guide 4.1 software (Copyright (c) 1999-2006 by SAS Institute Inc., Cary, NC, USA).

### **Descriptive analysis**

The statistical analysis will first present a descriptive analysis of the study population and their baseline parameters with absolute and relative frequencies (and their 95% confidence intervals) for the categorical variables, evaluation of means and distributions, medians and inter quartiles for the quantitative variables.

As the CONSORT guidelines recommend, the main characteristics of the patients will be compared between the two groups at inclusion, but no statistical analysis of this will be performed. The comparability of the two arms will be assessed clinically rather than statistically. A flow chart showing the number of eligible patients, the number of patients included, the number of patients randomized and the number of patients analysed will be presented. The characteristics of patients with poor compliance and of patients lost to follow up over the course of the study will be

described.

## **Outcomes analyses**

### **Analysis of the primary objective:**

The primary objective is to compare the percentage of decrease in VASI score between the two treatment groups. The percentage of decrease in VASI score is calculated as the difference between VASI at M6 and VASI at baseline divided by VASI at baseline.

The univariate comparison will be performed using Student test or Wilcoxon rank-sum test if parametric hypothesis are not verified.

The adjusted analysis will be performed using multivariable linear regression with decrease in VASI score as independent variable, treatment group as dependant variable and baseline VASI score, centre, and potentially other variables determined as described in the analysis strategy section, as adjustment variables.

### **Analysis of secondary objectives:**

1. The percentage of decrease in Vitiligo European Task Score (VETF) score (overall, staging and spreading) will be analysed using the same method as the decrease in VASI described in the primary objective analysis.
2. The PGA score will be compared between groups using a chi<sup>2</sup> test (or Fischer exact test if needed).
3. The change in DLQI score will be calculated as the difference between DLQI score at M6 and DLQI score at baseline. These differences will be compared between the groups using covariance analysis adjusted on baseline DLQI score. Additional adjustment will include variables described in the analysis strategy.
4. All the adverse effects listed in the end points section will be summarized in each treatment group.
5. The change in CXCL10 serum level will be calculated as the difference between CXCL10 serum level at M6 and CXCL10 serum level at baseline. These differences will be compared between the groups using covariance analysis adjusted on baseline CXCL10 serum level. Additional adjustment will include variables described in the analysis strategy.

For each all parameters presented above, a graphical description of the evolution will be performed using boxplot at each time point (baseline, M3, M6), by treatment group.

## 14. ADVERSE EFFECTS

### Definition

A serious adverse effect or event is defined as any symptom, sign, medical condition, or unfavorable event corresponding to one of the following criteria:

- may have contributed to a death;
- causes the patient to be critically ill;
- requires the patient to be hospitalized or prolongs hospitalization;
- results in significant or permanent disability/invalidity;
- causes a congenital anomaly or malformation.

Each adverse effect must be considered by the investigator and the sponsor. Its severity, likely causation by surgical procedure or associated treatments, and the degree to which it is expected or unexpected must be assessed.

A SUSAR: Suspected Unexpected Severe Adverse Reaction is an adverse effect whose nature, severity, intensity or timing does not correspond to the information available in the multidisciplinary meeting, investigator's brochure or the protocol.

In conformity with the 'loi du 09 août 2004 du Code de la Santé Publique' (French public health code, 2004): each occurrence of a serious adverse event must be immediately reported to the sponsor (DRCI- CHU de Nice – 4 avenue Reine Victoria – Hôpital de Cimiez 06001 Nice – 0492034011 – drc-chupromoteur@chu-nice.fr) who must declare adverse events associated with biomedical research to the CPP and ANSM within seven days (for fatal or life-threatening events) and within 15 days for other serious adverse reactions.

Monitoring for serious adverse events:

Throughout the study, all adverse effects will be recorded by clinical examination and bloods (Liver enzymes (AST, ALT, GGT), total cholesterol, HDL, LDL, triglycerides, creatinine kinase) at each visits.

If the liver enzymes showed transaminitis with increment of up to 3 folds of normal range, oral atorvastatin will be stopped.

If there is severe muscular symptoms with or without elevated CK and if there is muscular symptoms with 5 folds increase of CK level, oral atorvastatin will be stopped and only NB-UVB phototherapy will be continued.

If an unexpected severe symptom occurs it will be considered by the investigator. Clinical examination and bloods will be done as regularly as necessary and atorvastatin will be stopped.



## 15. ETHICAL AND REGULATORY REQUIREMENTS

- **Regulation**

All investigators involved in the project lead the trial in full compliance with:

- The Helsinki declaration:

The Declaration of Helsinki was established by the World Medical Association in June 1964 (recommendations to guide physicians in biomedical research), revised in Tokyo in October 1975 in Venice in October 1983 in Hong Kong in September 1989, Somerset West in October 1996 and in Edinburgh in October 2000.

- The European Directive on Good Clinical Practice in the Conduct of Clinical Trials:

Directive 2001/20/EC was adopted 4 April 2001 by the European Parliament and the Council of the European Union, and requires member states to approximate their laws, regulations and administrative provisions relating to the implementation of good clinical practice in the conduct of clinical trials on medicinal products for human use.

In France, drug testing is governed by practice guidelines laid out by the health minister and by decisions of the national agency for medicines and health products (Agence Nationale de Sécurité du Médicaments et produits de santé, the "ANSM") for products referred to in Article Ls 5311 -1 (medical devices, blood products ...).

Recommendations for good clinical practice apply: see ICH Topic E6, CPMP/ICH/135/95.

- Legislative and regulatory:

Public Health Law 2004-806 of August 9, 2004 (Articles L.1121-1 to L.1126-7). This Act amends the so-called Huriet-Sérusclat law 88-1138 of 20 December 1988, governing biomedical research performed for the development of biological and medical knowledge. The Enforcement Decree of the Act was published April 26, 2006 under number 2006-477. The scope of the law has been redefined, the Public Health Code (CSP) applies to research "organized and practiced on the human being for the development of biological and medical knowledge."

Decree n ° 2007-1220 of 10 August 2007 on the collection and preservation of the human body parts for scientific ends, amending the Code of Public Health (Regulations) Code of public health, in particular Articles L. 1232-6 and L. 1243-9.

- **Ethical considerations:**

- Patient information and consent:

Prior to the beginning of the research, the investigator is responsible for informing the person on the conduct of the trial and its consequences. The patient should also be informed of any medical alternatives, the terms of medical care provided at the end of research as well as his right to be informed on the overall results of the research.

Consent, freely and express will be collected in writing (article L-1122-1 of the Code of Public Health) knowing that the patient will have the opportunity to ask questions and be informed of his right to refuse to participate in research and withdraw at any time of the test without giving any justification and without prejudice thereby.

The investigator will sign the informed consent, in duplicate, retaining the original, and giving a copy to the patient.

- Medical examination and affiliation to a social security system:

Medical examination and affiliation to a social security system of a person who may participate in a trial is required for all biomedical research (Article L1121-11 of the Code of Public Health).

- Data confidentiality:

Medical and non-medical staff involved in the trial are subject to medical and professional confidentiality with the data collected during the study patient.

Documents relating to the trial should be stored in a cupboard or lockable room.

- **Registration of the trial in the database reference:**

The trial was registered in the national database managed by the National Security Agency for Medicines and Health Products (ANSM), which lists all biomedical research by French developers.

- **Role of the sponsor in the implementation of the project:**

- Liability Insurance :

The sponsor has insurance liability to the Hospital Mutual Insurance Company (SHAM) for the realization of this trial.

- Request authorization from the Comité de Protection des Personnes (CPP) and ANSM:

This study received the 24/06/2014 the approval of the CPP Sud-Méditerranée V and the 25/04/2014 the authorization of the ANSM.

After the commencement of the research, any substantial modification thereof to the initiative of

the sponsor must obtain, prior to its implementation, a favorable opinion of the CPP and authorization of ANSM. (Article L1123-9).

- Request authorization from the Comité consultatif sur le traitement de l'information en matière de recherche and the Commission National de l'Informatique et des Libertés :  
This study received the 30/06/2011 the authorization of the CNIL (MR-001).

- **Projects and results :**

- Trial beginning :

The beginning of the study is the first patient included in the trial.

The first inclusion in the study should be immediately communicated to the ANSM and the CPP. Research must be started within one year after the notification of the CPP which case the notice will lapse.

- Monitoring and inspection :

Quality control will be done by a Clinical Research Associate at the Direction de la Recherche Clinique et de l'Innovation appointed by the sponsor.

The nature and frequency of monitoring will be based on the procedure for setting the level of monitoring risk-based established and depend on the number of patients included, the rate of inclusions and difficulties encountered during the realization of the study.

CRA of the DRCI should verify with the investigator:

- Checking the accuracy and completeness of the CRF entries, source documents and other trial-related records against each other.
- Verifying that written informed consent was obtained before each subject's participation in the trial.
- SAE

For that point, the investigator agrees to make available for the CRA monitoring:

- The medical records of patients
- The Case Report Form
- The consent forms of included patients

The purposes of trial monitoring are to verify that:

- (a) The rights and well-being of human subjects are protected.
- (b) The reported trial data are accurate, complete, and verifiable from source documents.
- (c) The conduct of the trial is in compliance with the currently approved

protocol/amendment(s), with GCP, and with the applicable regulatory requirement(s).

An inspection is a formal control by the MSNA in order to evaluate the admissibility of clinical data, verify compliance with legislation and the absence of fraud. Inspectors check documents, logistics, records and any other resource that the authorities consider associated with the clinical trial and that may be on the scene of the trial, at the sponsor and / or local the provider service agency (Contract Research Organizations CRO) or other establishments if necessary.

- Final Scientific Report and end of study:

At the end of the test, it is imperative that the sponsor shall notify the CPP and ANSM the end of the research (date of last visit of the last patient) within 90 days.

The principal investigator shall prepare the final scientific report of the project which must contain the results and clinical implications of the study. The investigator will be invited to present these results to the Scientific Committee of the CHU of Nice.

A summary of the final report shall be communicated to the ANSM in the year following the end of the research.

Furthermore, at the end of the trial, the sponsor should informed associated centers and the CPP. According to the Law of August 9, 2004, patients may ask the investigator summarizes the overall results of the research as described in the disclosure documents.

- Storage :

Accordance with Good Clinical Practice, at the end of the trial, all documents relating to the Protocol shall be archived for a period of 15 years by the principal investigator.

All these documents must be located in a lockable room providing adequate safeguards against fire, water damage, light, or malice.

## **16. PUBLICATIONS**

Study findings may be submitted for publication in an international scientific dermatologic journal. Drs Chua and Nguyen will be the first two co first authors and Pr Cheng and Passeron will the two last co-authors. Dr Fontas in charge of the methodology and the statistical analysis will be third.

Any communication or publication must mention the sponsor of the study that is to say, the CHU of Nice and the funding source (PHRC). In this respect, the investigator must submit a copy of these communications and / or publications of the Department of Research and Innovation.

## 17. REFERENCES

1. Passeron, T. and J.P. Ortonne, Activation of the unfolded protein response in vitiligo: the missing link? *J Invest Dermatol*, 2012. 132(11): p. 2502-4.
2. Spritz, R.A., Six decades of vitiligo genetics: genome-wide studies provide insights into autoimmune pathogenesis. *J Invest Dermatol*, 2012. 132(2): p. 268-73.
3. Jin, Y., et al., Genome-wide association analyses identify 13 new susceptibility loci for generalized vitiligo. *Nat Genet*, 2012. 44(6): p. 676-80.
4. Bellei, B., et al., Vitiligo: a possible model of degenerative diseases. *PLoS One*, 2013. 8(3): p. e59782.
5. Schallreuter, K.U., et al., Basic evidence for epidermal H<sub>2</sub>O<sub>2</sub>/ONOO(-)-mediated oxidation/nitration in segmental vitiligo is supported by repigmentation of skin and eyelashes after reduction of epidermal H<sub>2</sub>O<sub>2</sub> with topical NB-UVB-activated pseudocatalase PC-KUS. *FASEB J*, 2013. 27(8): p. 3113-22.
6. Harris, J.E., et al., A Mouse Model of Vitiligo with Focused Epidermal Depigmentation Requires IFN-gamma for Autoreactive CD8(+) T-Cell Accumulation in the Skin. *J Invest Dermatol*.
7. Rashighi M, Agarwal P, Richmond JM, Harris TH, Dresser K, Su MW, Zhou Y, Deng A, Hunter CA, Luster AD, Harris JE. CXCL10 is critical for the progression and maintenance of depigmentation in a mouse model of vitiligo. *Sci Transl Med*. 2014 Feb 12;6(223):223ra23.
8. Taieb, A., et al., Guidelines for the management of vitiligo: the European Dermatology Forum consensus. *Br J Dermatol*, 2013. 168(1): p. 5-19.
9. Colucci R, Lotti T, Moretti S. Vitiligo: an update on current pharmacotherapy and future directions. *Expert Opin Pharmacother*. 2012 Sep;13(13):1885-99.
10. Noël M, Gagné C, Bergeron J, et al. Positive pleiotropic effects of HMG-CoA reductase inhibitor on vitiligo. *Lipids Health Dis* 2004; 3: 7.
11. Jowkar F, Namazi MR. Statins in dermatology. *Int J Dermatol*. 2010 Nov;49(11):1235-43.
12. Namazi MR. Statins: novel additions to the dermatologic arsenal? *Exp Dermatol*. 2004 Jun;13(6):337-9.
13. Feily A, Baktash D, Mohebbipour A, Feily A. Potential advantages of simvastatin as a novel anti-vitiligo arsenal. *Eur Rev Med Pharmacol Sci*. 2013 Jul;17(14):1982-3.
14. Rogers SL, Magliano DJ, Levison DB, Webb K, Clarke PJ, Grobler MP, Liew D. A dose-specific meta-analysis of lipid changes in randomized controlled trials of atorvastatin and simvastatin. *Clin Ther*. 2007 Feb;29(2):242-52
15. Fujita M, Morimoto T, Ikemoto M, Takeda M, Ikai A, Miwa K. Dose-dependency in pleiotropic effects of atorvastatin. *Int J Angiol*. 2007 Fall;16(3):89-91.
16. Finlay AY, Khan GK. Dermatology Life Quality Index (DLQI) – a simple practical routine clinical use. *Clin Exp Dermatol*, 1994 May; 19(3):210-6

17. Grimes PE, Hamzavi I, Lebwohl M, Ortonne JP, Lim HW. The efficacy of afamelanotide and narrowband UV-B phototherapy for repigmentation of vitiligo. *JAMA Dermatol.* 2013 Jan;149(1):68-73.

# ANNEXES

|                                                                            |           |
|----------------------------------------------------------------------------|-----------|
| <b>ANNEX 1 : VASI SCORE (VITILIGO ACTIVITY AND SEVERITY INDEX) .....</b>   | <b>32</b> |
| <b>ANNEX 2 : VETF SCORE (VITILIGO EUROPEAN TASK SCORE) .....</b>           | <b>33</b> |
| <b>ANNEX 3 : DLQI .....</b>                                                | <b>34</b> |
| <b>ANNEX 4 : STUDY VISIT SCHEDULE.....</b>                                 | <b>35</b> |
| <b>ANNEX 5 : EXAMPLES OF STANDARDIZED PICTURES .....</b>                   | <b>37</b> |
| <b>ANNEX 6 : ATORVASTATIN'S MONOGRAPH .....</b>                            | <b>40</b> |
| <b>ANNEX 7 : CURRICULUM VITAE OF THE TWO PRINCIPAL INVESTIGATORS .....</b> | <b>64</b> |

## ANNEX 1 : VASI Score (Vitiligo Activity and Severity Index)

$$VASI = \sum_{\text{All body sites}} [\text{Hand units}] \times [\text{Residual Depigmentation}]$$

The body is separated into five sites: hands, upper extremities, trunk, lower extremities and feet. One hand unit which encompasses the palm plus the volar surface of all the digits is approximately 1% of the total body surface area.

The extent of residual depigmentation is expressed by the following percentages: 0, 10%, 25%, 50%, 75%, 90%, or 100%.



## ANNEX 2 : VETF score (Vitiligo European Task Score)

### **Recommendation to assess stage using Wood's lamp (with magnifying lens)**

Stage 0: normal pigmentation (no depigmentation in area graded)

Stage 1: incomplete pigmentation (incl. spottly depigmentation, trichome and homogeneous pigmentation. A few white hairs at this stage do not change stage grading

Stage 2: complete depigmentation; a few white hairs at this stage do not change stage grading

Stage 3: partial hair whitening <30%;

Stage 4: complete hair whitening

### **Recommendation to assess spreading**

First, look at patch limits using natural light. Second compare with Wood's lamp limits.

Score: 0 means similar limits

Score: 1 means progressive vitiligo (ongoing subclinical depigmentation)

Score: -1 means regressive vitiligo (ongoing subclinical repigmentation)

| Staging*<br>(0-4) | Spreading*<br>(-1 +1) |
|-------------------|-----------------------|
|                   |                       |
|                   |                       |
|                   |                       |
|                   |                       |
|                   |                       |
| 0-20              | (-5 +5)               |

## ANNEX 3 : DLQI

### DERMATOLOGY LIFE QUALITY INDEX

Hospital No:  
Name:  
Address:

Date:  
Diagnosis:

Score:

DLQI

**The aim of this questionnaire is to measure how much your skin problem has affected your life OVER THE LAST WEEK. Please tick  one box for each question.**

- |     |                                                                                                                                                     |                                    |                                   |                                     |                                     |                                       |
|-----|-----------------------------------------------------------------------------------------------------------------------------------------------------|------------------------------------|-----------------------------------|-------------------------------------|-------------------------------------|---------------------------------------|
| 1.  | Over the last week, how <b>itchy, sore, painful</b> or <b>stinging</b> has your skin been?                                                          | Very much <input type="checkbox"/> | A lot <input type="checkbox"/>    | A little <input type="checkbox"/>   | Not at all <input type="checkbox"/> |                                       |
| 2.  | Over the last week, how <b>embarrassed</b> or <b>self conscious</b> have you been because of your skin?                                             | Very much <input type="checkbox"/> | A lot <input type="checkbox"/>    | A little <input type="checkbox"/>   | Not at all <input type="checkbox"/> |                                       |
| 3.  | Over the last week, how much has your skin interfered with you going <b>shopping</b> or looking after your <b>home</b> or <b>garden</b> ?           | Very much <input type="checkbox"/> | A lot <input type="checkbox"/>    | A little <input type="checkbox"/>   | Not at all <input type="checkbox"/> | Not relevant <input type="checkbox"/> |
| 4.  | Over the last week, how much has your skin influenced the <b>clothes</b> you wear?                                                                  | Very much <input type="checkbox"/> | A lot <input type="checkbox"/>    | A little <input type="checkbox"/>   | Not at all <input type="checkbox"/> | Not relevant <input type="checkbox"/> |
| 5.  | Over the last week, how much has your skin affected any <b>social</b> or <b>leisure</b> activities?                                                 | Very much <input type="checkbox"/> | A lot <input type="checkbox"/>    | A little <input type="checkbox"/>   | Not at all <input type="checkbox"/> | Not relevant <input type="checkbox"/> |
| 6.  | Over the last week, how much has your skin made it difficult for you to do any <b>sport</b> ?                                                       | Very much <input type="checkbox"/> | A lot <input type="checkbox"/>    | A little <input type="checkbox"/>   | Not at all <input type="checkbox"/> | Not relevant <input type="checkbox"/> |
| 7.  | Over the last week, has your skin prevented you from <b>working</b> or <b>studying</b> ?                                                            | Yes <input type="checkbox"/>       | No <input type="checkbox"/>       |                                     |                                     | Not relevant <input type="checkbox"/> |
|     | If "No", over the last week how much has your skin been a problem at <b>work</b> or <b>studying</b> ?                                               | A lot <input type="checkbox"/>     | A little <input type="checkbox"/> | Not at all <input type="checkbox"/> |                                     |                                       |
| 8.  | Over the last week, how much has your skin created problems with your <b>partner</b> or any of your <b>close friends</b> or <b>relatives</b> ?      | Very much <input type="checkbox"/> | A lot <input type="checkbox"/>    | A little <input type="checkbox"/>   | Not at all <input type="checkbox"/> | Not relevant <input type="checkbox"/> |
| 9.  | Over the last week, how much has your skin caused any <b>sexual difficulties</b> ?                                                                  | Very much <input type="checkbox"/> | A lot <input type="checkbox"/>    | A little <input type="checkbox"/>   | Not at all <input type="checkbox"/> | Not relevant <input type="checkbox"/> |
| 10. | Over the last week, how much of a problem has the <b>treatment</b> for your skin been, for example by making your home messy, or by taking up time? | Very much <input type="checkbox"/> | A lot <input type="checkbox"/>    | A little <input type="checkbox"/>   | Not at all <input type="checkbox"/> | Not relevant <input type="checkbox"/> |

**Please check you have answered EVERY question. Thank you.**

### ANNEX 4 : Study Visit Schedule

| Procedure                                                                                                                                                                                                               | Visit 0<br>Screening<br>Visit<br>(Day 0) | Visit 1<br>Day 1 | Visit 2<br>1 month | Visit 3<br>3 months | Visit 4<br>6 months |
|-------------------------------------------------------------------------------------------------------------------------------------------------------------------------------------------------------------------------|------------------------------------------|------------------|--------------------|---------------------|---------------------|
| Medical history<br>-Demographic data (age, gender, ethnic)<br>-Patient history (duration of vitiligo and any other associated skin conditions)<br>- Prior and current treatment including over-the-counter preparations | x                                        |                  |                    |                     |                     |
| Inclusion/Exclusion criteria                                                                                                                                                                                            | x                                        |                  |                    |                     |                     |
| Blood test: Liver enzymes (AST, ALT, GGT), creatinine, uric acid, TSH, creatinine kinase (CK), total cholesterol, HDL, LDL, triglycerides, Hepatitis B screening (HepBsAg, anti-HepBsAb).                               | x                                        |                  |                    |                     |                     |
| Urine pregnancy test.                                                                                                                                                                                                   | x                                        |                  |                    |                     |                     |
| Liver enzymes (AST, ALT, GGT), total cholesterol, HDL, LDL, triglycerides, creatinine kinase                                                                                                                            |                                          |                  | x                  | x                   | x                   |
| - Serum CXCL10 level                                                                                                                                                                                                    |                                          | x                |                    | x                   | x                   |
| Randomization in the Group A or B by central randomization                                                                                                                                                              |                                          | x                |                    |                     |                     |
| Clinical photography                                                                                                                                                                                                    |                                          | x                |                    | x                   | x                   |
| VASI score                                                                                                                                                                                                              |                                          | x                |                    | x                   | x                   |
| VETF score                                                                                                                                                                                                              |                                          | x                |                    | x                   | x                   |
| DLQI                                                                                                                                                                                                                    |                                          | x                |                    | x                   | x                   |
| NB-UVB phototherapy twice a week for 6 months                                                                                                                                                                           |                                          | x                | x                  | x                   | x                   |
| Oral atorvastatin will be started at 40mg daily                                                                                                                                                                         |                                          | x                |                    |                     |                     |
| Oral atorvastatin will be increased to 80mg daily after 1 month if clinically tolerated with no                                                                                                                         |                                          |                  | x                  |                     |                     |

|                                                                     |  |  |   |   |   |
|---------------------------------------------------------------------|--|--|---|---|---|
| adverse effects and if these bloods screened at 1 month are normal. |  |  |   |   |   |
| All adverse effects will be recorded                                |  |  | X | X | X |

**ANNEX 5 : Examples of standardized pictures**

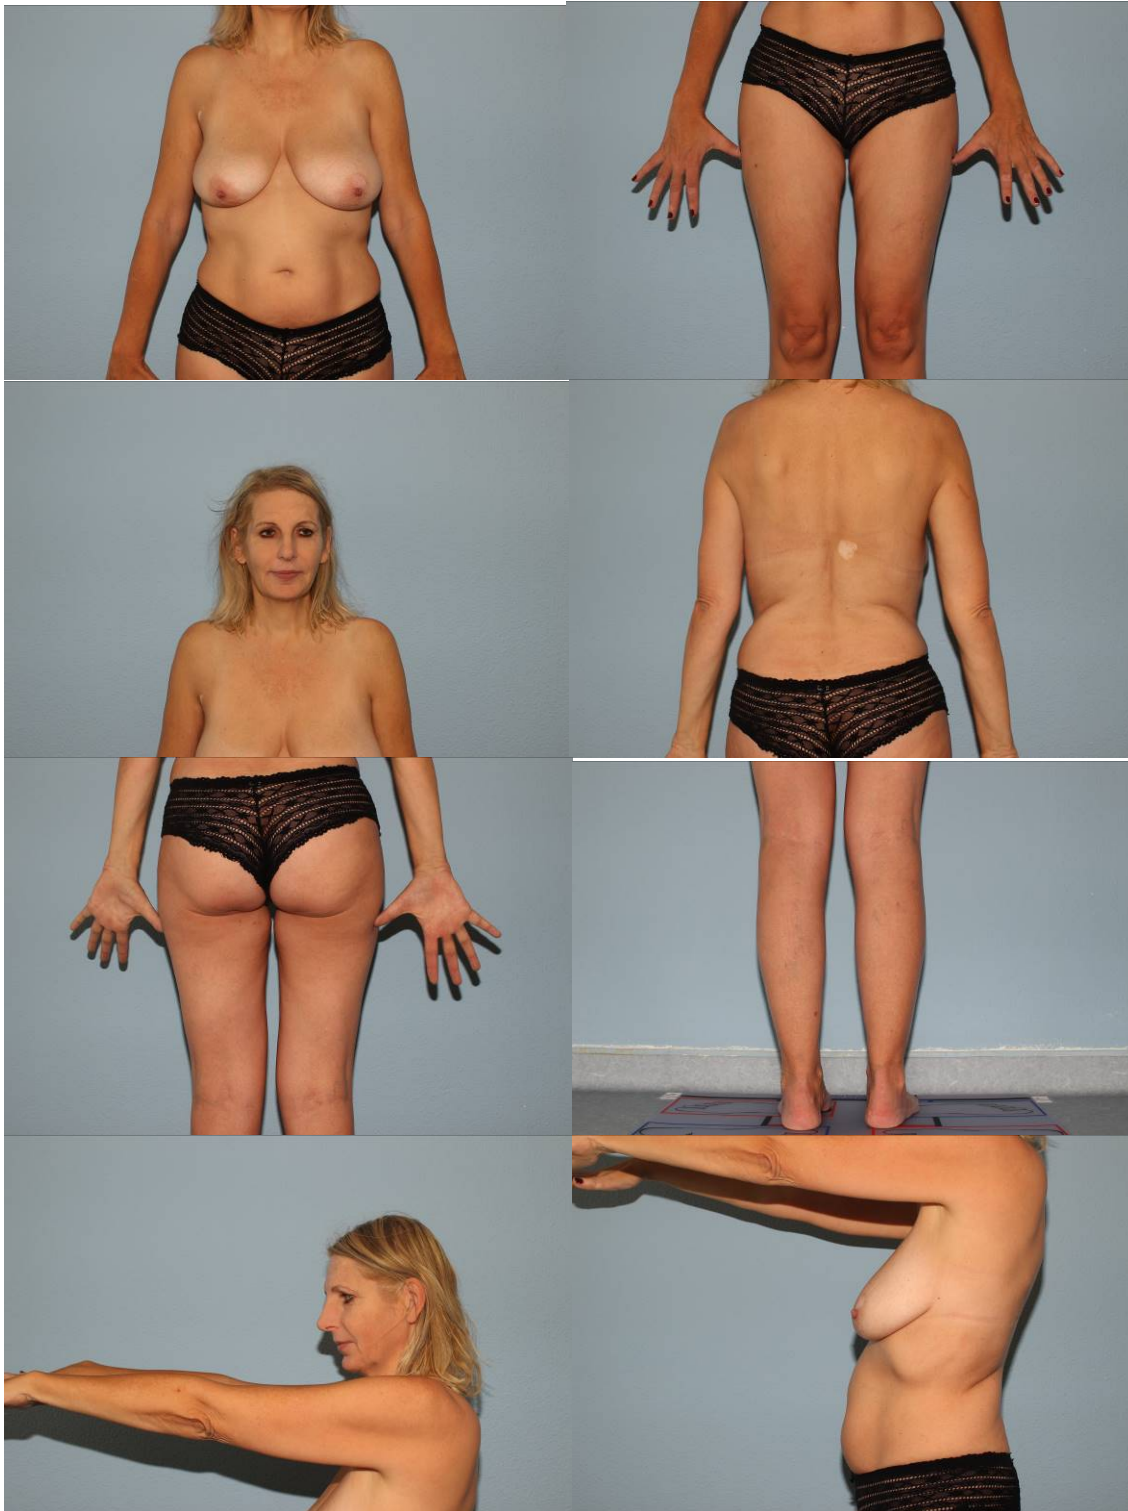

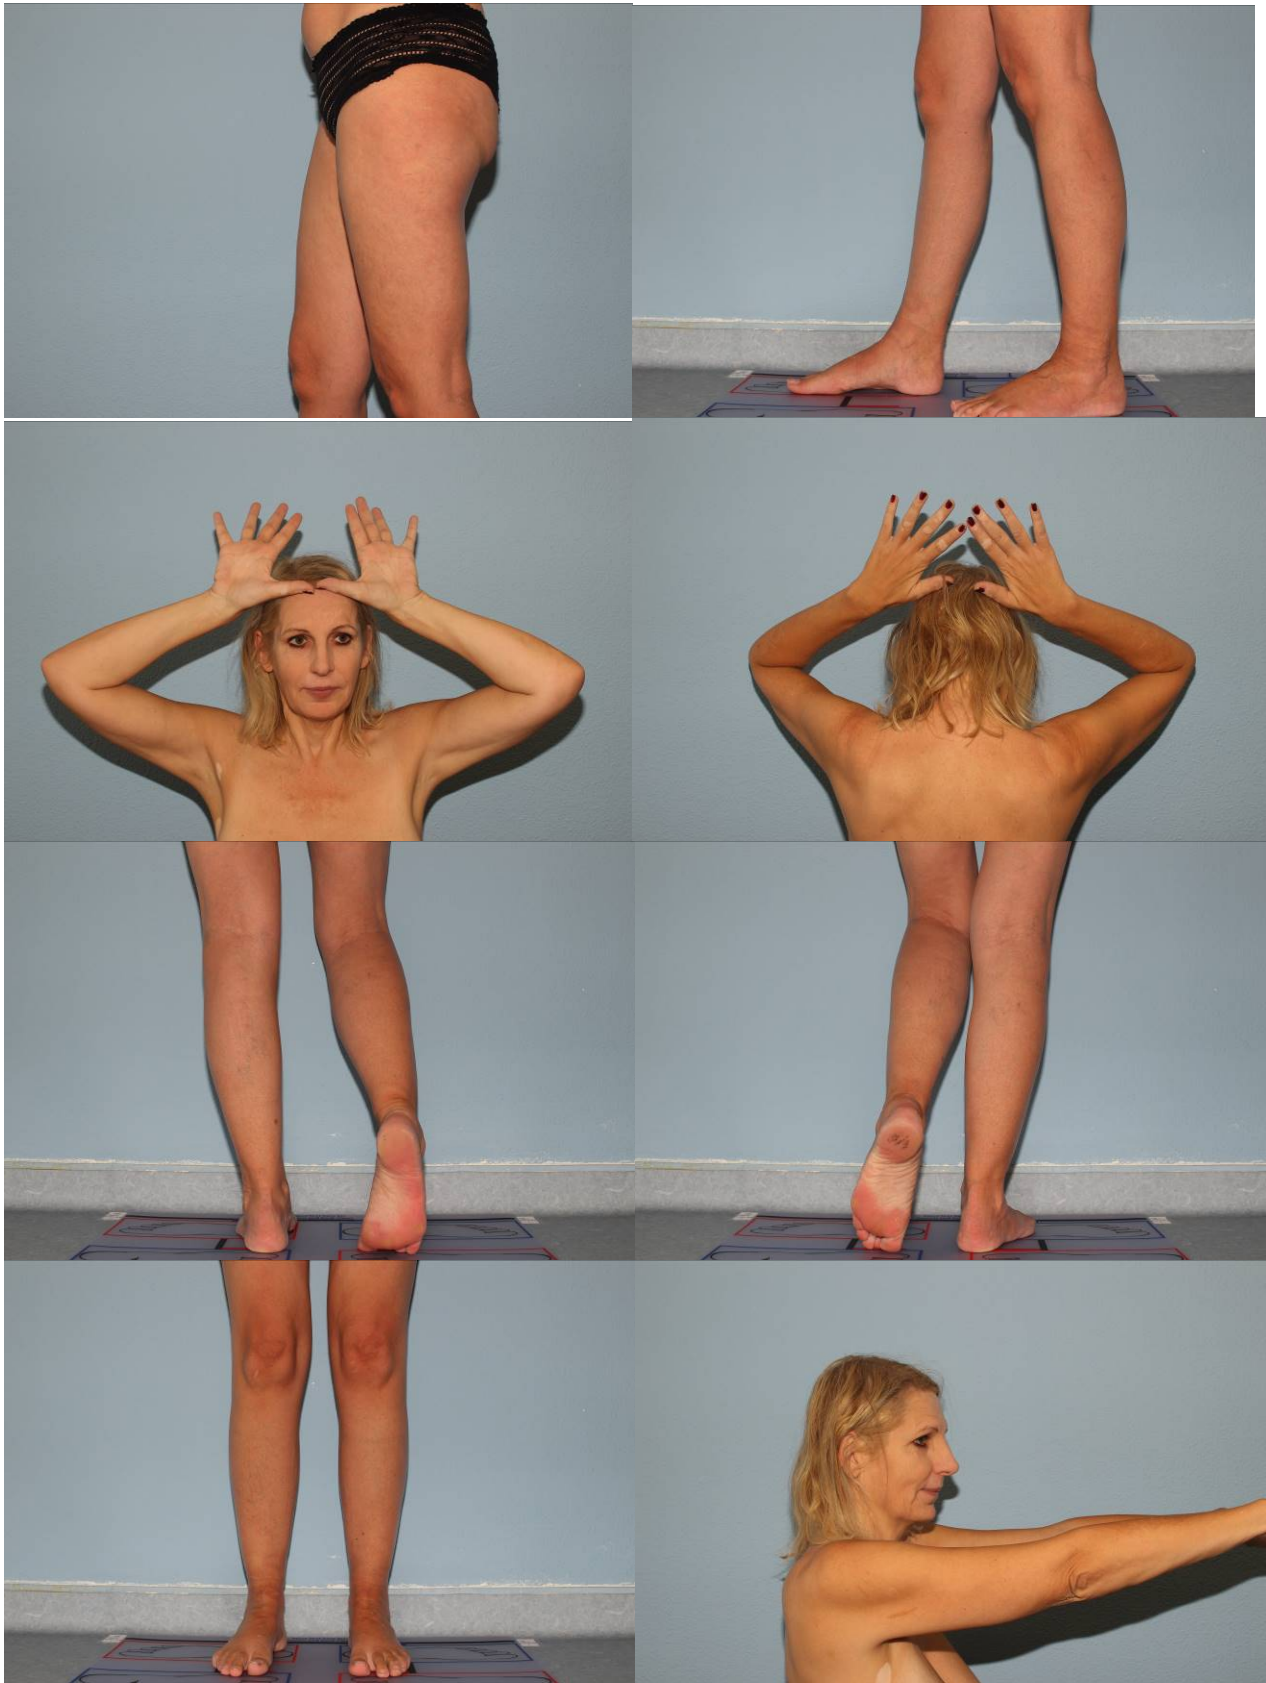

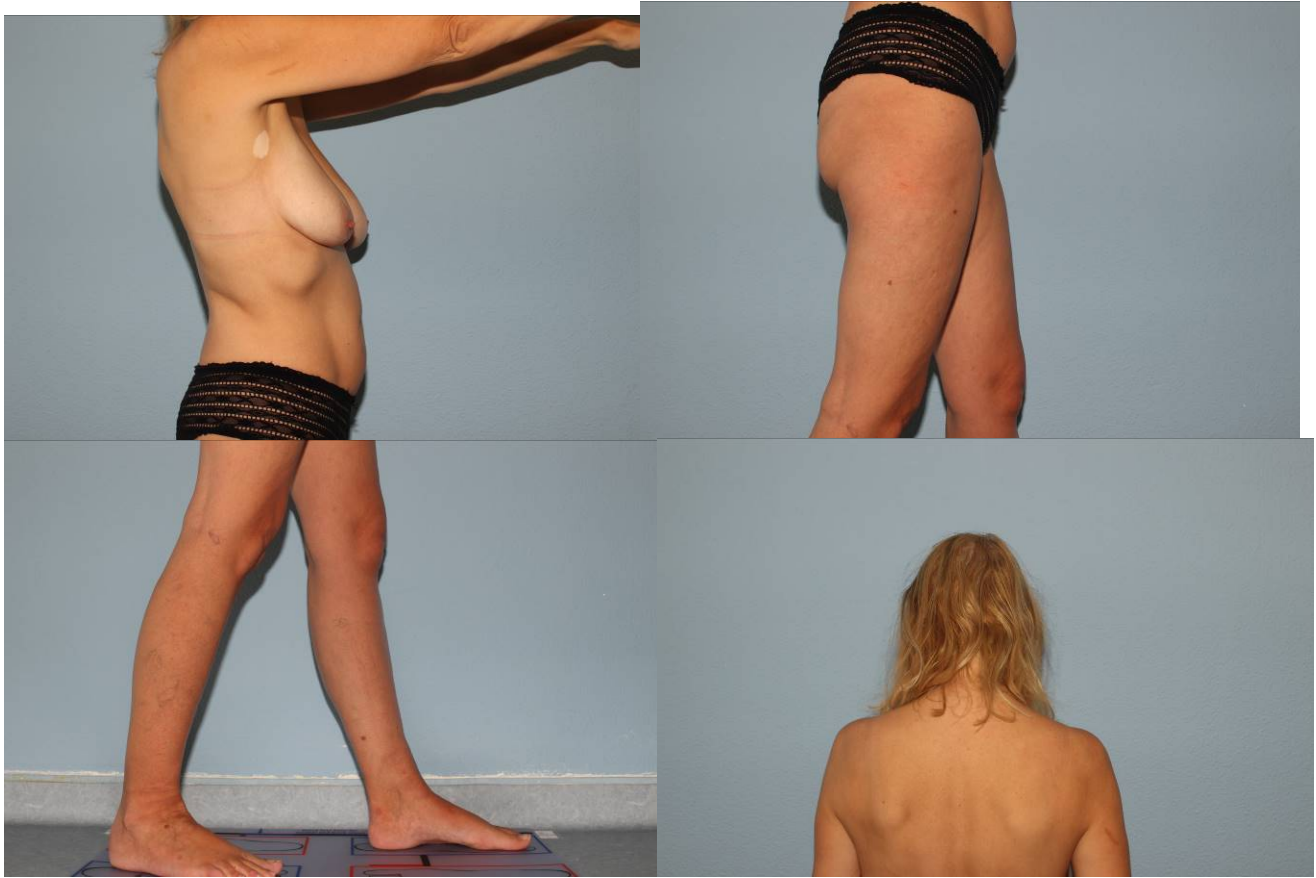

## ANNEX 6 : Atorvastatin's monograph

**VIDAL 2014**

**Médicaments**

Mise à jour du 05/11/2014

# \*TAHOR®

## atorvastatine

[Formes et présentations](#) | [Composition](#) | [Indications](#) | [Posologie et mode d'administration](#) | [Contre-indications](#) | [Mises en garde et précautions d'emploi](#) | [Interactions](#) | [Fertilité/grossesse/allaitement](#) | [Conduite et utilisation de machines](#) | [Effets indésirables](#) | [Surdosage](#) | [Pharmacodynamie](#) | [Pharmacocinétique](#) | [Sécurité préclinique](#) | [Modalités de conservation](#) | [Modalités manipulation/élimination](#) | [Prescription/délivrance/prise en charge](#)

### **FORMES et PRÉSENTATIONS** [\(début page\)](#)

Comprimé pelliculé à 10 mg (rond, gravé « 10 » sur une face et « ATV » sur l'autre face ; blanc), à 20 mg (rond, gravé « 20 » sur une face et « ATV » sur l'autre face ; blanc), à 40 mg (rond, gravé « 40 » sur une face et « ATV » sur l'autre face ; blanc), et à 80 mg (rond, gravé « 80 » sur une face et « ATV » sur l'autre face ; blanc) : Boîtes de 28, sous plaquettes thermoformées de 7 ; boîtes de 90, sous plaquettes thermoformées de 10.

Modèles hospitaliers : Boîtes de 50, sous plaquettes thermoformées de 10.

Comprimé à croquer à 10 mg (rond avec des tâches roses à violettes, gravé avec « 10 » sur une face et « LCT » sur l'autre face, mesurant 7,1 mm de diamètre ; blanc à blanc cassé) et à 20 mg (rond avec des tâches roses à violettes, gravé avec « 20 » sur une face et « LCT » sur l'autre face, mesurant 8,7 mm de diamètre ; blanc à blanc cassé) : Boîtes de 30, sous plaquettes thermoformées.

### **COMPOSITION** [\(début page\)](#)

|                                                                                                                                                         | <i>p cp</i> |       |
|---------------------------------------------------------------------------------------------------------------------------------------------------------|-------------|-------|
| Atorvastatine (DCI)                                                                                                                                     | 10 mg       |       |
|                                                                                                                                                         | ou          | 20 mg |
|                                                                                                                                                         | ou          | 40 mg |
|                                                                                                                                                         | ou          | 80 mg |
| (sous forme calcique trihydratée : 10,85 mg/cp 10 mg ; 21,69 mg/cp pellic 20 mg et 21,70 mg/cp à croquer 20 mg ; 43,38 mg/cp 40 mg ; 86,76 mg/cp 80 mg) |             |       |

*Excipients :*

*Comprimés pelliculés :* carbonate de calcium, cellulose microcristalline, lactose monohydraté, croscarmellose sodique, polysorbate 80, hyprolose, stéarate de magnésium. *Pelliculage :* hypromellose, macrogol 8000, dioxyde de titane, talc. *Émulsion anti-mousse :* siméticone, stéarates émulsifiants, épaississants, acide benzoïque, acide sorbique, acide sulfurique, eau.

*Comprimés à croquer :* carbonate de calcium, cellulose microcristalline, croscarmellose sodique, polysorbate 80, stéarate de magnésium, hyprolose, amidon pré-gélatinisé, mannitol (E421), aspartam (E951), sucralose (E955), parfum raisin.



Teneur en lactose monohydraté (cp pellic) : 27,25 mg/cp à 10 mg ; 54,50 mg/cp à 20 mg ; 109 mg/cp à 40 mg ; 218 mg/cp à 80 mg.

Teneur en aspartam (cp à croquer) : 1,25 mg/cp à 10 mg ; 2,5 mg/cp à 20 mg.

## **DC INDICATIONS** [\(début page\)](#)

### *Hypercholestérolémie :*

Tahor est indiqué en complément d'un régime pour réduire les taux élevés de cholestérol total (Chol-T), de LDL-cholestérol (LDL-C), d'apolipoprotéine B et de triglycérides chez les adultes, adolescents et enfants âgés de 10 ans ou plus présentant une hypercholestérolémie primaire incluant l'hypercholestérolémie familiale (hétérozygote) ou les hyperlipidémies mixtes (correspondant aux types IIa et IIb de la classification de Fredrickson), lorsque la réponse à un régime ou à d'autres traitements non pharmacologiques n'est pas suffisante.

Tahor est aussi indiqué pour réduire les taux de Chol-T et de LDL-C chez les adultes présentant une hypercholestérolémie familiale homozygote en complément d'autres traitements hypolipémiants (notamment l'aphérese des LDL) ou si de tels traitements sont indisponibles.

### *Prévention des maladies cardiovasculaires :*

Prévention des événements cardiovasculaires chez les patients adultes ayant un risque élevé de présenter un premier événement cardiovasculaire, en complément de la correction des autres facteurs de risques.

## **DC POSOLOGIE ET MODE D'ADMINISTRATION** [\(début page\)](#)

### **Posologie :**

Avant de commencer un traitement par Tahor, le patient doit suivre un régime alimentaire hypocholestérolémiant standard. Ce régime sera ensuite continué pendant toute la durée du traitement par Tahor.

La posologie doit être adaptée individuellement en fonction des taux initiaux de LDL-cholestérol, de l'objectif thérapeutique et de la réponse au traitement du patient.

La posologie initiale usuelle est de 10 mg une fois par jour. L'adaptation posologique devra être effectuée en respectant un intervalle minimum de 4 semaines. La posologie maximale est de 80 mg une fois par jour.

### *Hypercholestérolémie primaire et hyperlipidémie combinée (mixte) :*

Une dose de 10 mg d'atorvastatine en une seule prise est suffisante chez la majorité des patients.

Un effet thérapeutique est observé après deux semaines de traitement, l'effet maximum étant atteint après 4 semaines de traitement. L'effet se maintient en cas de traitement prolongé.

### *Hypercholestérolémie familiale hétérozygote :*

Le traitement par Tahor doit débuter à une posologie de 10 mg par jour. La dose sera ensuite adaptée individuellement toutes les quatre semaines jusqu'à 40 mg par jour. Par la suite, la posologie peut être augmentée jusqu'à 80 mg par jour au maximum. Un chélateur des acides

biliaires peut être également prescrit en association avec une posologie de 40 mg d'atorvastatine par jour.

*Hypercholestérolémie familiale homozygote :*

Les données disponibles sont limitées (cf Pharmacodynamie).

Chez les patients présentant une hypercholestérolémie familiale homozygote, la posologie d'atorvastatine varie de 10 à 80 mg par jour (cf Pharmacodynamie). Chez ces patients, l'atorvastatine doit être administrée en complément aux autres traitements hypolipémiants (notamment l'aphérèse du LDL-cholestérol) ou lorsque de tels traitements ne sont pas disponibles.

*Prévention des maladies cardiovasculaires :*

Dans les études de prévention primaire, la posologie utilisée était de 10 mg/jour. Une posologie plus élevée peut être nécessaire pour atteindre les objectifs cibles du LDL-cholestérol fixés par les recommandations en vigueur.

*Patients atteints d'insuffisance rénale :*

Aucune adaptation posologique n'est nécessaire (cf Mises en garde et Précautions d'emploi).

*Patients atteints d'insuffisance hépatique :*

Tahor doit être utilisé avec précaution chez les patients présentant une insuffisance hépatique (cf Mises en garde et Précautions d'emploi, Pharmacocinétique). Tahor est contre-indiqué chez les patients présentant une affection hépatique évolutive (cf Contre-indications).

*Utilisation chez le sujet âgé :*

Chez les patients âgés de plus de 70 ans traités aux doses recommandées, l'efficacité et la sécurité d'emploi sont similaires à celles observées dans la population générale.

*Population pédiatrique :*

Hypercholestérolémie :

L'utilisation pédiatrique doit être mise en oeuvre seulement par des médecins expérimentés dans le traitement de l'hyperlipidémie pédiatrique et les patients doivent être suivis régulièrement pour évaluer les progrès.

Pour les patients âgés de 10 ans ou plus, la dose initiale recommandée d'atorvastatine est de 10 mg par jour, et peut être augmentée jusqu'à 20 mg par jour. Cette augmentation de dose doit être effectuée en fonction de la réponse et de la tolérance des patients pédiatriques au traitement. Les données de sécurité des patients pédiatriques traités avec une dose supérieure à 20 mg, soit environ 0,5 mg/kg, sont limitées.

L'expérience est limitée chez les enfants âgés de 6 à 10 ans (cf Pharmacodynamie).

L'atorvastatine n'est pas indiquée dans le traitement de patients âgés de moins de 10 ans.

D'autres formes pharmaceutiques/dosages peuvent être plus appropriées pour cette population.

Coût du traitement journalier : 0,53 euro(s) (cp 10 mg, bte de 28) ; 0,50 euro(s) (cp 10 mg, bte de 90) ; 0,98 euro(s) (cp 20 mg, bte de 28) ; 0,92 euro(s) (cp 20 mg, bte de 90) ; 1,09 euro(s) (cp 40 mg, cp 80 mg, btes de 28) ; 1,02 euro(s) (cp 40 mg, cp 80 mg, btes de 90).

**Mode d'administration :**

Tahor est destiné à la voie orale.

La prise d'atorvastatine se fera en 1 prise quotidienne unique quel que soit le moment de la journée, pendant ou en dehors des repas.

Les comprimés à croquer Tahor peuvent être mâchés ou avalés entiers avec un verre d'eau.

## **DC** CONTRE-INDICATIONS [\(début page\)](#)

- Hypersensibilité à la substance active ou à l'un des excipients de ce médicament, mentionnés à la rubrique Composition.
- Patient atteint d'une affection hépatique évolutive ou ayant des élévations persistantes et inexpliquées des transaminases sériques supérieures à trois fois la limite supérieure de la normale.
- Femme enceinte, allaitante ou en âge de procréer et n'utilisant pas de méthode contraceptive fiable (cf Fertilité/Grossesse/Allaitement).

## **DC** MISES EN GARDE et PRÉCAUTIONS D'EMPLOI [\(début page\)](#)

### ***Effets hépatiques :***

Des épreuves fonctionnelles hépatiques doivent être réalisées avant le début du traitement puis régulièrement après l'instauration de celui-ci. Des tests fonctionnels hépatiques doivent être réalisés chez les patients développant des signes ou symptômes évoquant une altération hépatique.

Les patients présentant une augmentation du taux sérique des transaminases doivent être surveillés jusqu'à normalisation.

En cas d'augmentation persistante des transaminases au-delà de trois fois la limite supérieure de la normale (LSN), la posologie devra être diminuée ou Tahor devra être arrêté (cf Effets indésirables).

Tahor doit être utilisé avec prudence chez les patients consommant des quantités importantes d'alcool et/ou ayant des antécédents d'affection hépatique.

### ***Prévention des AVC par diminution agressive des taux de cholestérol (étude SPARCL) :***

Dans une analyse a posteriori réalisée dans des sous-groupes de patients ayant fait un AVC ou un accident ischémique transitoire (AIT) récent mais ne présentant pas d'insuffisance coronarienne, une fréquence plus élevée d'AVC hémorragique a été observée chez les patients traités par 80 mg d'atorvastatine par rapport aux patients sous placebo.

Ce risque élevé est particulièrement observé chez des patients ayant déjà fait un AVC hémorragique ou un infarctus lacunaire à l'inclusion de l'étude.

Chez les patients ayant un antécédent d'AVC hémorragique ou d'infarctus lacunaire, la balance bénéfique/risque de l'atorvastatine 80 mg est incertaine. De ce fait, le risque potentiel de survenue d'AVC hémorragique devra être soigneusement évalué avant toute initiation de traitement (cf Pharmacodynamie).

### ***Effets sur les muscles squelettiques :***

L'atorvastatine, comme les autres inhibiteurs de l'HMG-CoA réductase, peut, dans de rares cas, affecter les muscles squelettiques et entraîner des myalgies, des myosites et des myopathies qui peuvent évoluer vers une rhabdomyolyse potentiellement fatale caractérisée par des taux élevés de créatine phosphokinase [CPK] (> 10 fois la limite supérieure de la normale [LSN]), une myoglobulinémie et une myoglobulinurie pouvant entraîner une insuffisance rénale.

#### ***Avant l'initiation du traitement :***

L'atorvastatine doit être prescrite avec précaution chez les patients présentant des facteurs prédisposant à une rhabdomyolyse.

Avant de débiter un traitement par une statine, le taux de CPK doit être mesuré dans les situations suivantes :

- Insuffisance rénale.
- Hypothyroïdie.
- Antécédents personnels ou familiaux de maladies musculaires héréditaires.
- Antécédents de toxicité musculaire lors d'un traitement par une statine ou un fibrate.
- Antécédents d'affection hépatique et/ou de consommation excessive d'alcool.
- Chez les patients âgés (> 70 ans), la nécessité de ces mesures doit être évaluée, en fonction de la présence d'autres facteurs prédisposant à une rhabdomyolyse.
- Situations où une augmentation des concentrations plasmatiques peut se produire, du fait des interactions (cf Interactions) et de l'utilisation dans des populations particulières incluant les polymorphismes génétiques (cf Pharmacocinétique).

Dans ces situations, une réévaluation régulière du bénéfice/risque du traitement, ainsi qu'une surveillance clinique régulière, sont recommandées.

Si le taux basal de CPK est significativement élevé (> 5 fois la LSN), le traitement ne doit pas débuter.

*Mesure de la créatine phosphokinase :*

La mesure du taux de créatine phosphokinase (CPK) ne doit pas être effectuée après un exercice physique important ni en présence de facteurs susceptibles d'en augmenter le taux, l'interprétation des résultats étant difficile dans ces cas. En cas d'élévation significative des CPK (> 5 LSN) avant traitement, un contrôle sera effectué 5 à 7 jours plus tard pour confirmer les résultats.

*Pendant le traitement :*

- Il faut demander aux patients de signaler rapidement toute douleur musculaire inexplicée, crampe ou faiblesse musculaire, en particulier si elles s'accompagnent de malaise ou de fièvre.
- Si ces symptômes apparaissent sous traitement par atorvastatine, un dosage des CPK doit être effectué. Si le taux de CPK est significativement élevé (> 5 LSN), le traitement doit être interrompu.
- Si ces symptômes sont sévères et entraînent une gêne quotidienne, l'arrêt du traitement doit être envisagé, même si le taux de CPK est égal ou inférieur à 5 fois la LSN.
- Si les symptômes disparaissent et si le taux de CPK se normalise, la reprise du traitement par atorvastatine ou par une autre statine peut être envisagée à la dose la plus faible sous étroite surveillance.
- Le traitement par atorvastatine doit être interrompu en cas d'augmentation cliniquement significative du taux de CPK (> 10 fois la LSN) ou si une rhabdomyolyse est diagnostiquée ou suspectée.

*Association avec d'autres médicaments :*

Le risque de rhabdomyolyse est majoré lorsque l'atorvastatine est administrée en association avec certains médicaments qui peuvent augmenter la concentration plasmatique de l'atorvastatine, tels que les inhibiteurs puissants du CYP3A4 ou les transporteurs protéiques (ciclosporine, télichromycine, clarithromycine, delavirdine, stiripentol, kétoconazole, voriconazole, itraconazole, posaconazole, et les inhibiteurs de protéase du VIH incluant ritonavir, lopinavir, atazanavir, indinavir, darunavir, etc). Le risque de myopathie peut être également augmenté en association avec le gemfibrozil et les autres fibrates, le bocéprévir, l'érythromycine, la niacine, l'ézétimibe, le télaprévir, ou l'association tipranavir/ritonavir. Des

alternatives thérapeutiques ne présentant pas ces interactions devront être envisagées dans la mesure du possible.

De très rares cas de myopathie nécrosante à médiation immunitaire ont été signalés pendant ou après un traitement par statines, y compris par atorvastatine. Sur le plan clinique, la myopathie nécrosante à médiation immunitaire se caractérise par une faiblesse musculaire proximale et une augmentation de la concentration sérique en créatinine kinase, qui persistent malgré l'arrêt des statines.

Dans le cas où l'association de ces médicaments est nécessaire, le bénéfice/risque des traitements concomitants doit être soigneusement évalué. Une dose maximale plus faible est recommandée chez les patients recevant des médicaments pouvant augmenter les concentrations plasmatiques d'atorvastatine. De même, en cas d'association avec les inhibiteurs puissants du CYP3A4, une dose initiale plus faible d'atorvastatine doit être utilisée et une surveillance clinique étroite est recommandée.

L'utilisation concomitante d'atorvastatine et d'acide fusidique est déconseillée, ainsi, une suspension temporaire du traitement par l'atorvastatine peut être envisagée au cours d'un traitement par acide fusidique (cf Interactions).

#### **Utilisation pédiatrique :**

La sécurité relative à la croissance n'est pas établie dans la population pédiatrique (cf Effets indésirables).

#### **Pneumopathie interstitielle :**

Des cas exceptionnels de pneumopathie interstitielle ont été rapportés lors de la prise de certaines statines, en particulier en cas de traitement à long terme (cf Effets indésirables). Les symptômes se caractérisent par une dyspnée, une toux non productive et une altération de l'état de santé général (fatigue, perte de poids et fièvre). En cas de suspicion d'une pneumopathie interstitielle chez un patient, le traitement par statine doit être interrompu.

#### **Diabète :**

Certaines données suggèrent que les statines, en tant que classe pharmacologique, augmenteraient la glycémie. Chez certains patients à risque élevé de survenue d'un diabète, les statines peuvent entraîner une hyperglycémie nécessitant l'instauration d'un traitement antidiabétique. Ce risque est néanmoins compensé par la réduction du risque vasculaire sous statines et par conséquent il ne doit pas être un motif d'arrêt des statines. Les patients à risque (glycémie à jeun comprise entre 5,6 et 6,9 mmol/l, IMC > 30 kg/m<sup>2</sup>, augmentation du taux des triglycérides, hypertension artérielle) devront faire l'objet d'une surveillance clinique et biologique conformément aux recommandations nationales.

#### **Excipients :**

- Comprimé pelliculé : Tahor contient du lactose. Les patients présentant les troubles héréditaires rares que sont l'intolérance au galactose, le déficit en lactase de Lapp et le syndrome de malabsorption du glucose et du galactose ne doivent pas prendre ce médicament.
- Comprimé à croquer : Tahor, comprimé à croquer contient de l'aspartam, qui est une source de phénylalanine. Peut être dangereux pour les patients atteints de phénylcétonurie.

## **Interactions médicamenteuses :**

### ***Effet de certains médicaments sur la concentration plasmatique de l'atorvastatine :***

L'atorvastatine est métabolisée par le cytochrome P450 3A4, et elle est également un substrat des transporteurs protéiques tels que le transporteur hépatocytaire OATP1B1. L'administration concomitante de médicaments inhibiteurs du CYP3A4 ou des transporteurs protéiques peut augmenter les concentrations plasmatiques d'atorvastatine et entraîner un risque majoré de myopathie. Le risque peut aussi être augmenté lors de l'administration concomitante d'atorvastatine avec d'autres médicaments pouvant induire des myopathies, tels que les fibrates et l'ézétimibe (cf Mises en garde et Précautions d'emploi).

### ***Inhibiteurs du CYP3A4 :***

Les concentrations plasmatiques d'atorvastatine sont augmentées de façon importante lors de l'association avec les inhibiteurs puissants du CYP3A4 (cf tableau 1 et les informations spécifiques ci-dessous). L'association d'inhibiteurs puissants du CYP3A4 (tels que ciclosporine, téli-thromycine, clarithromycine, delavirdine, stiripentol, kétoconazole, voriconazole, itraconazole, posaconazole, et les inhibiteurs de protéase du VIH incluant ritonavir, lopinavir, atazanavir, indinavir, darunavir, etc) doit être évitée dans la mesure du possible. Dans les cas où l'association de ces médicaments s'avère nécessaire, une dose initiale plus faible et une dose maximale plus faible doivent être envisagées et une surveillance clinique étroite du patient est recommandée (cf tableau 1).

Les inhibiteurs modérés du CYP3A4 (tels que érythromycine, diltiazem, vérapamil et le fluconazole) peuvent augmenter les concentrations plasmatiques d'atorvastatine (cf tableau 1). Une majoration du risque de myopathie a été observée lors de l'administration concomitante d'érythromycine et de statines.

Aucune étude d'interaction évaluant les effets de l'amiodarone ou du vérapamil sur l'atorvastatine n'a été réalisée. L'amiodarone et le vérapamil étant tous deux connus pour inhiber l'activité du CYP3A4, leur association avec l'atorvastatine peut entraîner une augmentation de l'exposition à l'atorvastatine.

C'est pourquoi une dose initiale plus faible d'atorvastatine doit être prescrite et une surveillance clinique adéquate du patient doit être mise en place. Une surveillance clinique appropriée est recommandée après l'initiation du traitement ou après une adaptation posologique de l'inhibiteur du CYP 3A4.

### ***Inducteurs du CYP3A4 :***

L'administration concomitante d'atorvastatine avec un inducteur du cytochrome P450 3A (tels que l'efavirenz, la rifampicine ou le millepertuis) peut entraîner des diminutions variables de la concentration plasmatique d'atorvastatine. En raison du double mécanisme d'interaction de la rifampicine (induction du cytochrome P450 3A et inhibition du transporteur hépatocytaire OATP1B1), l'administration simultanée d'atorvastatine et de rifampicine est conseillée, car une administration séparée dans le temps de l'atorvastatine et de la rifampicine a été associée à une diminution significative des concentrations plasmatiques d'atorvastatine.

L'effet de la rifampicine sur les concentrations hépatocytaires d'atorvastatine est toutefois inconnu. Si l'association s'avère nécessaire, l'efficacité du traitement doit être particulièrement surveillée.

### ***Inhibiteurs des transporteurs :***

Les inhibiteurs des transporteurs (tels que la ciclosporine) peuvent augmenter l'exposition systémique à l'atorvastatine (cf tableau 1). L'effet de l'inhibition des transporteurs

hépatocytaires sur les concentrations hépatocytaires d'atorvastatine est inconnu. Si l'association s'avère nécessaire, la dose doit être diminuée et l'efficacité du traitement doit être surveillée (cf tableau 1).

*Gemfibrozil/dérivés de l'acide fibrique :*

Un traitement par les fibrates seuls est parfois associé à des événements musculaires, tels que les rhabdomyolyses. Le risque de survenue de ces événements peut être augmenté en cas d'utilisation concomitante d'un dérivé de l'acide fibrique et d'atorvastatine. Si l'association s'avère nécessaire, une dose d'atorvastatine plus faible pour atteindre l'objectif thérapeutique doit être utilisée et le patient doit faire l'objet d'un suivi approprié (cf Mises en garde et Précautions d'emploi).

*Ézétimibe :*

L'ézétimibe seul est associé à des événements musculaires, tels que des rhabdomyolyses. Le risque de survenue de ces événements peut ainsi être augmenté en cas de traitement concomitant par ézétimibe et atorvastatine. Une surveillance clinique adéquate de ces patients est recommandée.

*Colestipol :*

L'association de Tahor et de colestipol entraîne une diminution d'environ 25 % des concentrations plasmatiques d'atorvastatine et de ses métabolites actifs. Les effets hypolipémiant sont cependant plus importants lorsque Tahor et le colestipol sont administrés simultanément par rapport à une administration séparée.

*Acide fusidique :*

Aucune étude d'interaction entre l'atorvastatine et l'acide fusidique n'a été réalisée. Comme avec les autres statines, en cas d'association d'atorvastatine et d'acide fusidique, des événements musculaires, incluant des rhabdomyolyses, ont été rapportés depuis la commercialisation. Le mécanisme de cette interaction est inconnu. Une surveillance étroite des patients doit être mise en place et le traitement par atorvastatine devrait être temporairement suspendu.

*Colchicine :*

Bien qu'aucune étude d'interaction entre l'atorvastatine et la colchicine n'ait été réalisée, des cas de myopathie ont été rapportés lors de l'association de l'atorvastatine et de la colchicine. Des précautions doivent être prises lors de la prescription d'atorvastatine avec de la colchicine.

***Effet de l'atorvastatine sur les médicaments administrés en association :***

*Digoxine :*

À l'état d'équilibre, les concentrations plasmatiques de digoxine sont légèrement augmentées lors de l'administration concomitante de doses répétées de digoxine et de 10 mg d'atorvastatine. Les patients traités par digoxine doivent être surveillés de façon adéquate.

*Contraceptifs oraux :*

L'administration concomitante de Tahor et d'un contraceptif oral a entraîné une augmentation des concentrations plasmatiques de la noréthindrone et de l'éthinylestradiol.

*Warfarine :*

Dans une étude clinique conduite chez des patients recevant un traitement chronique de warfarine, l'administration concomitante de 80 mg par jour d'atorvastatine et de warfarine a induit une légère diminution, d'environ 1,7 seconde, du temps de prothrombine au cours des 4 premiers jours du traitement, ce temps se normalisant dans les 15 premiers jours du traitement par atorvastatine.

Bien que seulement de très rares cas d'interactions anticoagulantes cliniquement significatives aient été rapportés, le temps de prothrombine doit être déterminé avant de débiter le traitement par atorvastatine chez les patients recevant des anticoagulants dérivés de la coumarine, puis au

début du traitement à une fréquence suffisante pour s'assurer qu'aucune modification significative du temps de prothrombine n'apparaît. Dès que la stabilité du temps de prothrombine est atteinte, le temps de prothrombine pourra être suivi à la fréquence habituellement pratiquée chez les patients traités par anticoagulants dérivés de la coumarine. Si la dose d'atorvastatine est modifiée ou le traitement interrompu, la même procédure doit être répétée. Le traitement par atorvastatine n'a pas été associé à des saignements ou des modifications du temps de prothrombine chez les patients ne recevant pas d'anticoagulants.

### **Population pédiatrique :**

Les études d'interactions médicamenteuses ont été seulement réalisées chez l'adulte. L'importance des interactions dans la population pédiatrique n'est pas connue. Les interactions mentionnées ci-dessus chez l'adulte et les précautions d'emploi de la rubrique Mises en garde et Précautions d'emploi doivent être prises en compte pour la population pédiatrique.

| Tableau 1 : Effet des médicaments administrés en association avec l'atorvastatine sur les paramètres pharmacocinétiques de l'atorvastatine                                                                                                                                                     |                                                              |                                             |
|------------------------------------------------------------------------------------------------------------------------------------------------------------------------------------------------------------------------------------------------------------------------------------------------|--------------------------------------------------------------|---------------------------------------------|
| <i>Médicament administré en association et posologie</i>                                                                                                                                                                                                                                       | <i>Atorvastatine</i>                                         |                                             |
|                                                                                                                                                                                                                                                                                                | <i>Dose (mg)</i>                                             | <i>Modification de la SSC<sup>(1)</sup></i> |
| Tipranavir 500 mg 2 x/jour - Ritonavir 200 mg 2 x/jour, 8 jours (jours 14 à 21)                                                                                                                                                                                                                | 40 mg le 1 <sup>er</sup> jour, 10 mg le 20 <sup>e</sup> jour | ^ 9,4 fois                                  |
| Télaprévir 750 mg toutes les 8 h, 10 jours                                                                                                                                                                                                                                                     | 20 mg, DU                                                    | ^ 7,9 fois                                  |
| Ciclosporine 5,2 mg/kg/jour, dose stable                                                                                                                                                                                                                                                       | 10 mg 1 x/jour pendant 28 jours                              | ^ 8,7 fois                                  |
| <i>Recommandations cliniques<sup>(2)</sup> : Dans le cas où l'association d'atorvastatine est nécessaire, ne pas dépasser 10 mg/jour d'atorvastatine. Un suivi clinique adéquat de ces patients est recommandé.</i>                                                                            |                                                              |                                             |
| Lopinavir 400 mg 2 x/jour - Ritonavir 100 mg 2 x/jour, 14 jours                                                                                                                                                                                                                                | 20 mg 1 x/jour pendant 4 jours                               | ^ 5,9 fois                                  |
| Clarithromycine 500 mg 2 x/jour, 9 jours                                                                                                                                                                                                                                                       | 80 mg 1 x/jour pendant 8 jours                               | ^ 4,4 fois                                  |
| <i>Recommandations cliniques<sup>(2)</sup> : Dans le cas où l'association avec l'atorvastatine est nécessaire, une diminution de la dose d'entretien de l'atorvastatine est recommandée. A des doses d'atorvastatine &gt; à 20 mg, une surveillance clinique des patients est recommandée.</i> |                                                              |                                             |
| Saquinavir 400 mg 2 x/jour - Ritonavir (300 mg 2 x/jour à partir des jours 5-7, augmenté à 400 mg 2 x/jour le jour 8), jours 4-18, 30 min après la prise d'atorvastatine                                                                                                                       | 40 mg 1 x/jour pendant 4 jours                               | ^ 3,9 fois                                  |
| Darunavir 300 mg 2 x/jour - Ritonavir 100 mg 2 x/jour, 9 jours                                                                                                                                                                                                                                 | 10 mg 1 x/jour pendant 4 jours                               | ^ 3,3 fois                                  |
| Itraconazole 200 mg 1 x/jour, 4 jours                                                                                                                                                                                                                                                          | 40 mg, DU                                                    | ^ 3,3 fois                                  |
| Fosamprénavir 700 mg 2 x/jour - Ritonavir 100 mg 2 x/jour, 14 jours                                                                                                                                                                                                                            | 10 mg 1 x/jour pendant 4 jours                               | ^ 2,5 fois                                  |
| Fosamprénavir 1400 mg 2 x/jour, 14 jours                                                                                                                                                                                                                                                       | 10 mg 1 x/jour                                               | ^ 2,3 fois                                  |



|                                                                                                                                                                                                                                                                                              |                                   |                 |
|----------------------------------------------------------------------------------------------------------------------------------------------------------------------------------------------------------------------------------------------------------------------------------------------|-----------------------------------|-----------------|
|                                                                                                                                                                                                                                                                                              | pendant 4 jours                   |                 |
| <i>Recommandations cliniques</i> <sup>(2)</sup> : Dans le cas où l'association avec l'atorvastatine est nécessaire, une diminution de la dose d'entretien de l'atorvastatine est recommandée. A des doses d'atorvastatine > à 40 mg, une surveillance clinique des patients est recommandée. |                                   |                 |
| Nelfinavir 1250 mg 2 x/jour, 14 jours                                                                                                                                                                                                                                                        | 10 mg 1 x/jour pendant 28 jours   | ^ 1,7 fois*     |
| <i>Recommandations cliniques</i> <sup>(2)</sup> : Pas de recommandation spécifique.                                                                                                                                                                                                          |                                   |                 |
| Jus de pamplemousse, 240 ml 1 x/jour**                                                                                                                                                                                                                                                       | 40 mg, DU                         | ^ 37 %          |
| <i>Recommandations cliniques</i> <sup>(2)</sup> : La consommation d'importantes quantités de jus de pamplemousse n'est pas recommandée au cours d'un traitement par atorvastatine.                                                                                                           |                                   |                 |
| Diltiazem 240 mg 1 x/jour, 28 jours                                                                                                                                                                                                                                                          | 40 mg, DU                         | ^ 51 %          |
| <i>Recommandations cliniques</i> <sup>(2)</sup> : Une surveillance clinique appropriée des patients est recommandée à la suite de l'instauration du traitement ou d'une adaptation posologique du diltiazem.                                                                                 |                                   |                 |
| Érythromycine 500 mg 4 x/jour, 7 jours                                                                                                                                                                                                                                                       | 10 mg, DU                         | ^ 33 %*         |
| <i>Recommandations cliniques</i> <sup>(2)</sup> : Une dose maximale plus faible et un suivi clinique de ces patients sont recommandés.                                                                                                                                                       |                                   |                 |
| Amlodipine 10 mg, dose unique                                                                                                                                                                                                                                                                | 80 mg, DU                         | ^ 18 %          |
| Cimétidine 300 mg 4 x/jour, 2 semaines                                                                                                                                                                                                                                                       | 10 mg 1 x/jour pendant 2 semaines | V moins de 1 %* |
| Suspension antiacide d'hydroxydes de magnésium et d'aluminium, 30 ml 4 x/jour, 2 semaines                                                                                                                                                                                                    | 10 mg 1 x/jour pendant 4 semaines | V 35 %*         |
| Efavirenz 600 mg 1 x/jour, 14 jours                                                                                                                                                                                                                                                          | 10 mg pendant 3 jours             | V 41 %          |
| <i>Recommandations cliniques</i> <sup>(2)</sup> : Pas de recommandation spécifique.                                                                                                                                                                                                          |                                   |                 |
| Rifampicine 600 mg 1 x/jour, 7 jours (prises simultanées)                                                                                                                                                                                                                                    | 40 mg, DU                         | ^ 30 %          |
| Rifampicine 600 mg 1 x/jour, 5 jours (prises séparées)                                                                                                                                                                                                                                       | 40 mg, DU                         | V 80 %          |
| <i>Recommandations cliniques</i> <sup>(2)</sup> : Si l'association s'avère nécessaire, l'administration simultanée d'atorvastatine et de rifampicine est recommandée, avec suivi clinique.                                                                                                   |                                   |                 |
| Gemfibrozil 600 mg 2 x/jour, 7 jours                                                                                                                                                                                                                                                         | 40 mg, DU                         | ^ 35 %          |
| Fénofibrate 160 mg 1 x/jour, 7 jours                                                                                                                                                                                                                                                         | 40 mg, DU                         | ^ 3 %           |
| <i>Recommandations cliniques</i> <sup>(2)</sup> : Une dose initiale plus faible et un suivi clinique des patients sont recommandés.                                                                                                                                                          |                                   |                 |
| Bocéprévir 800 mg 3 x/jour, 7 jours                                                                                                                                                                                                                                                          | 40 mg, DU                         | ^ 2,3 fois      |
| <i>Recommandations cliniques</i> <sup>(2)</sup> : Une dose initiale plus faible et un suivi clinique des patients sont recommandés. La dose d'atorvastatine ne doit pas excéder 20 mg par jour durant l'administration concomitante de bocéprévir.                                           |                                   |                 |

Une augmentation est indiquée par « ^ », une diminution par « V ».

1 x/jour = une fois par jour ; DU = dose unique ; 2x/jour = deux fois par jour ; 3x/jour = trois fois par jour ; 4x/jour = quatre fois par jour.

(1) Les résultats présentés en multiples de (ou x-fois) sont à considérer comme le rapport entre l'administration concomitante des deux produits et l'atorvastatine seule (par exemple : 1 fois = pas de modification du rapport). Les résultats présentés en % représentent la différence en % par rapport à l'atorvastatine seule (par exemple, 0 % = pas de modification).

(2) Cf Mises en garde et Précautions d'emploi et Interactions pour la pertinence clinique.

\* Activité totale en équivalent atorvastatine.

\*\* Contient un ou plusieurs composants qui inhibent le CYP3A4 et peuvent augmenter les concentrations plasmatiques des médicaments métabolisés par le CYP3A4. La prise d'un verre de 240 ml de jus de pamplemousse a également entraîné une diminution de 20,4 % de la SSC du métabolite actif orthohydroxy. De grandes quantités de jus de pamplemousse (plus de 1,2 litre par jour pendant cinq jours) ont augmenté de 2,5 fois la SSC de l'atorvastatine et celle des substances actives (atorvastatine et métabolites).

Tableau 2 : Effet de l'atorvastatine sur les paramètres pharmacocinétiques de médicaments administrés en association

| Posologie de l'atorvastatine                                                                                       | Médicament coadministré                                                               |                                       |
|--------------------------------------------------------------------------------------------------------------------|---------------------------------------------------------------------------------------|---------------------------------------|
|                                                                                                                    | Posologie du médicament (mg)                                                          | Modification de la SSC <sup>(1)</sup> |
| 80 mg 1x/jour pendant 10 jours                                                                                     | Digoxine 0,25 mg 1x/jour, 20 jours                                                    | ^ 15 %                                |
| <i>Recommandations cliniques</i> : Les patients traités par la digoxine doivent être surveillés de façon adéquate. |                                                                                       |                                       |
| 40 mg 1x/jour pendant 22 jours                                                                                     | Contraceptif oral 1x/jour, 2 mois<br>- noréthindrone 1 mg<br>- éthinylestradiol 35 µg | ^ 28 %<br>^ 19 %                      |
| 80 mg 1x/jour pendant 15 jours                                                                                     | Phénazone* 600 mg, DU                                                                 | ^ 3 %                                 |
| 10 mg, DU                                                                                                          | Tipranavir 500 mg 2 x/jour - ritonavir 200 mg 2 x/jour, 7 jours                       | Pas de modification                   |
| 10 mg, 1 x/jour pendant 4 jours                                                                                    | Fosamprénavir 1400 mg 2 x/jour, 14 jours                                              | V 27 %                                |
| 10 mg 1 x/jour pendant 4 jours                                                                                     | Fosamprénavir 700 mg 2 x/jour - ritonavir 100 mg 2 x/jour, 14 jours                   | Pas de modification                   |
| <i>Recommandations cliniques</i> : Pas de recommandation spécifique.                                               |                                                                                       |                                       |

Une augmentation est indiquée par « ^ », une diminution par « V ». 1x/jour = une fois par jour ; DU = dose unique.

(1) Les résultats présentés en % représentent la différence en % par rapport à l'atorvastatine seule (par exemple, 0 % = pas de modification).

\* L'administration concomitante de doses répétées d'atorvastatine et de phénazone n'a exercé que peu ou pas d'effet détectable sur la clairance de la phénazone.

## **DC FERTILITÉ/GROSSESSE/ALLAITEMENT** [\(début page\)](#)

### **Femmes en âge d'avoir des enfants :**

Les femmes en âge d'avoir des enfants doivent utiliser des mesures contraceptives fiables pendant le traitement (cf Contre-indications).

### **Grossesse :**

Tahor est contre-indiqué pendant la grossesse (cf Contre-indications). La sécurité d'emploi de l'atorvastatine n'a pas été établie chez la femme enceinte. Aucun essai clinique contrôlé n'a été réalisé chez des femmes enceintes traitées par atorvastatine. Suite à une exposition intra-utérine à des inhibiteurs de l'HMG-CoA réductase, des anomalies congénitales ont rarement été rapportées. Les études chez l'animal ont mis en évidence une toxicité sur la reproduction (cf Sécurité préclinique).

Un traitement de la mère par l'atorvastatine peut réduire le taux foetal du mévalonate, qui est un précurseur de la biosynthèse du cholestérol. L'athérosclérose est un processus chronique, et l'interruption d'un médicament hypolipémiant pendant une grossesse devrait généralement avoir peu d'effet sur le risque à long terme associé à une hypercholestérolémie primaire.

Pour ces raisons, Tahor ne doit pas être utilisé pendant la grossesse, ni chez une femme envisageant une grossesse ou chez laquelle une grossesse est suspectée. Le traitement par Tahor doit être suspendu pendant la grossesse ou tant qu'il n'a pas été déterminé que la femme n'est pas enceinte (cf Contre-indications).

### **Allaitement :**

L'excrétion de l'atorvastatine ou de ses métabolites actifs dans le lait maternel n'est pas établie. Chez le rat, les concentrations plasmatiques d'atorvastatine et de ses métabolites sont similaires à celles retrouvées dans le lait (cf Sécurité préclinique).

En raison de la possibilité d'effets indésirables graves, les femmes traitées par Tahor ne doivent pas allaiter leur nourrisson (cf Contre-indications). L'atorvastatine est contre-indiquée pendant l'allaitement (cf Contre-indications).

### **Fertilité :**

Aucun effet de l'atorvastatine sur la fertilité n'a été mis en évidence lors d'études conduites chez l'animal mâle ou femelle (cf Sécurité préclinique).

## **DC CONDUITE et UTILISATION DE MACHINES** [\(début page\)](#)

Tahor n'a qu'un effet négligeable sur l'aptitude à conduire des véhicules et à utiliser des machines.

## **DC EFFETS INDÉSIRABLES** [\(début page\)](#)

Dans les études cliniques contrôlées ayant comparé l'effet de l'atorvastatine à un placebo chez 16 066 patients (8755 patients traités par Tahor ; 7311 patients recevant un placebo) traités pendant une durée moyenne de 53 semaines, 5,2 % des patients traités par atorvastatine ont arrêté le traitement en

raison d'effets indésirables, contre 4,0 % des patients recevant un placebo.

Les effets indésirables présentés ci-après observés avec l'atorvastatine sont issus d'études cliniques et de l'importante expérience acquise depuis la commercialisation du produit.

Les fréquences estimées des effets indésirables sont classées selon la convention suivante : fréquent ( $\geq 1/100$ ,  $< 1/10$ ) ; peu fréquent ( $\geq 1/1000$ ,  $< 1/100$ ) ; rare ( $\geq 1/10\ 000$ ,  $< 1/1000$ ) ; très rare ( $< 1/10\ 000$ ) ; fréquence indéterminée (ne peut être estimée sur la base des données disponibles).

Infections et infestations :

- Fréquent : nasopharyngite.

Affections hématologiques et du système lymphatique :

- Rare : thrombocytopénie.

Affections du système immunitaire :

- Fréquent : réactions allergiques.
- Très rare : anaphylaxie.

Troubles du métabolisme et de la nutrition :

- Fréquent : hyperglycémie.
- Peu fréquent : hypoglycémie, prise de poids, anorexie.

Affections psychiatriques :

- Peu fréquent : cauchemars, insomnie.

Affections du système nerveux :

- Fréquent : céphalées.
- Peu fréquent : vertiges, paresthésies, hypoesthésie, dysgueusie, amnésie.
- Rare : neuropathie périphérique.

Affections oculaires :

- Peu fréquent : vision floue.
- Rare : troubles visuels.

Affections de l'oreille et du labyrinthe :

- Peu fréquent : acouphènes.
- Très rare : perte d'audition.

Affections respiratoires, thoraciques et médiastinales :

- Fréquent : douleur pharyngolaryngée, épistaxis.

#### Affections gastro-intestinales :

- Fréquent : constipation, flatulences, dyspepsie, nausées, diarrhée.
- Peu fréquent : vomissements, douleurs abdominales hautes et basses, éructation, pancréatite.

#### Affections hépatobiliaires :

- Peu fréquent : hépatite.
- Rare : cholestase.
- Très rare : insuffisance hépatique.

#### Affections de la peau et du tissu sous-cutané :

- Peu fréquent : urticaire, éruption cutanée, prurit, alopecie.
- Rare : oedème angioneurotique, dermatose bulleuse dont érythème polymorphe, syndrome de Stevens-Johnson et syndrome de Lyell.

#### Affections musculosquelettiques et du tissu conjonctif :

- Fréquent : myalgies, arthralgies, douleur des extrémités, spasmes musculaires, gonflement des articulations, douleur dorsale.
- Peu fréquent : douleur cervicale, fatigue musculaire.
- Rare : myopathie, myosite, rhabdomyolyse, tendinopathie, parfois compliquée d'une rupture.
- Fréquence indéterminée : myopathie nécrosante à médiation immunitaire.

#### Affections des organes de reproduction et du sein :

- Très rare : gynécomastie.

#### Troubles généraux et anomalies au site d'administration :

- Peu fréquent : malaise, asthénie, douleur thoracique, oedème périphérique, fatigue, pyrexie.

#### Investigations :

- Fréquent : anomalies des tests de la fonction hépatique, augmentation du taux sanguin de la créatine phosphokinase.
- Peu fréquent : leucocyturie.

Comme avec les autres inhibiteurs de l'HMG-CoA réductase, des augmentations du taux sérique des transaminases ont été rapportées chez des patients recevant Tahor. Ces modifications ont été habituellement légères et transitoires et n'ont pas nécessité d'interruption du traitement. Des augmentations cliniquement significatives (> 3 fois la limite supérieure de la normale) du taux des transaminases sériques ont été observées chez 0,8 % des patients traités par Tahor. Ces augmentations étaient dose-dépendantes et réversibles chez tous les patients.

Une augmentation du taux sérique de la créatine phosphokinase (CPK) de plus de 3 fois la limite supérieure de la normale a été observée chez 2,5 % des patients sous Tahor, proportion similaire à celle observée avec les autres inhibiteurs de l'HMG-CoA réductase au cours d'études cliniques. Des taux

sériques supérieurs à 10 fois la limite supérieure de la normale ont été constatés chez 0,4 % des patients traités par Tahor (cf Mises en garde et Précautions d'emploi).

*Population pédiatrique :*

La base de données cliniques de pharmacovigilance comprend des données de sécurité pour 249 patients pédiatriques ayant reçu de l'atorvastatine, parmi lesquels 7 patients étaient âgés de moins de 6 ans, 14 patients étaient dans une tranche d'âge de 6 à 9 ans, et 228 patients étaient dans une tranche d'âge de 10 à 17 ans.

Affections du système nerveux :

- Fréquent : céphalées.

Affections gastro-intestinales :

- Fréquent : douleur abdominale.

Investigations :

- Fréquent : augmentation de l'alanine aminotransférase, augmentation de la créatine phosphokinase sanguine

Sur la base des données disponibles, la fréquence, le type et la sévérité des réactions indésirables chez l'enfant sont attendus identiques à ceux chez l'adulte. L'expérience concernant la sécurité à long terme dans la population pédiatrique est actuellement limitée.

*Les événements indésirables suivants ont été rapportés avec certaines statines :*

- Troubles sexuels.
- Dépression.
- Cas exceptionnels de pneumopathie interstitielle, particulièrement au cours d'un traitement à long terme (cf Mises en garde et Précautions d'emploi).
- Diabète : la fréquence dépend de la présence ou non de facteurs de risques (glycémie à jeun  $\geq 5,6$  mmol/l, IMC  $> 30$  kg/m<sup>2</sup>, augmentation du taux des triglycérides, antécédents hypertension artérielle).

**Déclaration des effets indésirables suspectés :**

La déclaration des effets indésirables suspectés après autorisation du médicament est importante. Elle permet une surveillance continue du rapport bénéfice/risque du médicament. Les professionnels de santé déclarent tout effet indésirable suspecté via le système national de déclaration : Agence nationale de sécurité du médicament et des produits de santé (ANSM) et réseau des Centres Régionaux de Pharmacovigilance. Site internet : [www.ansm.sante.fr](http://www.ansm.sante.fr).

**DC SURDOSAGE** ([début page](#))

Il n'existe pas de traitement spécifique d'un surdosage en Tahor. En cas de surdosage, le traitement doit être symptomatique et des mesures d'accompagnement adaptées doivent être mises en oeuvre selon les besoins. La fonction hépatique et les taux des CPK doivent être contrôlés. En raison de l'importance de la liaison de l'atorvastatine aux protéines plasmatiques, l'hémodialyse ne devrait pas significativement augmenter la clairance de l'atorvastatine.

Classe pharmacothérapeutique : hypolipémiants, inhibiteurs de l'HMG-CoA réductase (code ATC : C10AA05).

L'atorvastatine est un inhibiteur sélectif et compétitif de l'HMG-CoA réductase, enzyme responsable du contrôle du taux de biotransformation de la 3-hydroxy-3-méthylglutaryl-coenzyme A en mévalonate, un précurseur des stérols, et en particulier du cholestérol.

Les triglycérides et le cholestérol hépatiques sont incorporés aux lipoprotéines de très basse densité (VLDL) et sont libérés dans le plasma pour atteindre les tissus périphériques. Les lipoprotéines de basse densité (LDL) se forment à partir des VLDL et sont essentiellement catabolisées au niveau des récepteurs à forte affinité pour les LDL (récepteurs des LDL).

L'atorvastatine diminue le taux de cholestérol plasmatique et les concentrations sériques des lipoprotéines en inhibant l'HMG-CoA réductase et, en conséquence, la biosynthèse hépatique du cholestérol. L'atorvastatine accroît également le nombre des récepteurs des LDL à la surface des hépatocytes, amplifiant ainsi le captage et le catabolisme des LDL.

L'atorvastatine diminue la synthèse des LDL et le nombre des particules de LDL. Elle entraîne une augmentation importante et prolongée de l'activité des récepteurs des LDL ainsi qu'une amélioration qualitative des particules de LDL circulantes. L'atorvastatine réduit efficacement le LDL-C chez les patients présentant une hypercholestérolémie familiale homozygote, une population habituellement résistante aux autres médicaments hypolipémiants.

Une étude de dose-réponse a montré que l'atorvastatine réduit les concentrations de cholestérol total (30 % à 46 %), de LDL-C (41 % à 61 %), de l'apolipoprotéine B (34 % à 50 %) et des triglycérides (14 % à 33 %) et augmentait celles du HDL-C et de l'apolipoprotéine A1. Ces résultats sont également observés chez des patients présentant une hypercholestérolémie familiale hétérozygote, une hypercholestérolémie non familiale ou une hyperlipidémie mixte, ainsi que chez les patients présentant un diabète non insulino-dépendant.

Il a été démontré que les diminutions du cholestérol total, du LDL-C et de l'apolipoprotéine B diminuaient le risque d'événements cardiovasculaires et de décès d'origine cardiovasculaire.

#### *Hypercholestérolémie familiale homozygote :*

Une étude multicentrique en ouvert d'utilisation compassionnelle d'une durée de 8 semaines avec une phase d'extension optionnelle d'une durée variable a été réalisée chez 335 patients, 89 étaient atteints d'une hypercholestérolémie familiale homozygote. Chez ces 89 patients, la diminution moyenne en pourcentage du LDL-C a été d'environ 20 %. L'atorvastatine a été administrée à des doses allant jusqu'à 80 mg/jour.

#### *Athérosclérose :*

L'étude REVERSAL (Reversing Atherosclerosis with Aggressive Lipid- Lowering Study) a étudié l'effet sur l'athérosclérose coronaire d'un traitement hypolipémiant intensif par 80 mg d'atorvastatine à celui d'un traitement hypolipémiant standard par 40 mg de pravastatine évalué par échographie intravasculaire (IVUS) réalisée au cours d'une angiographie chez des patients atteints de coronaropathie. Dans cet essai multicentrique en double aveugle, randomisé et

contrôlé, une IVUS a été réalisée à l'inclusion et 18 mois après chez 502 patients. Aucune progression de l'athérosclérose n'a été observée dans le groupe atorvastatine (n = 253). La modification du volume athéromateux total en pourcentage (médiane) par rapport à la valeur basale (critère principal de l'étude) a été de - 0,4 % (p = 0,98) dans le groupe atorvastatine et de + 2,7 % (p = 0,001) dans le groupe pravastatine (n = 249). L'effet obtenu dans le groupe atorvastatine comparativement à celui obtenu dans le groupe pravastatine est significatif (p = 0,02). Cette étude n'avait pas pour objectif d'étudier l'effet d'un traitement hypolipémiant intensif sur la survenue des événements cardiovasculaires (tels que le recours à la revascularisation, la survenue des infarctus du myocarde non fatals, ou les décès d'origine coronarienne).

Dans le groupe atorvastatine, le taux moyen de LDL-C a été réduit à 2,04 mmol/l ± 0,8 (78,9 mg/dl ± 30) par rapport à la valeur basale de 3,89 mmol/l ± 0,7 (150 mg/dl ± 28). Dans le groupe pravastatine, le taux moyen de LDL-C a été réduit à 2,85 mmol/l ± 0,7 (110 mg/dl ± 26) par rapport à la valeur basale de 3,89 mmol/l ± 0,7 (150 mg/dl ± 26), p < 0,0001.

L'atorvastatine a également significativement réduit le taux moyen de cholestérol total de 34,1 % (groupe pravastatine : - 18,4 %, p < 0,0001), les taux moyens de triglycérides de 20 % (groupe pravastatine : - 6,8 %, p < 0,0009) et les taux moyens d'apolipoprotéine B de 39,1 % (groupe pravastatine : - 22,0 %, p < 0,0001).

L'atorvastatine a augmenté le taux moyen de HDL-C de 2,9 % (groupe pravastatine : + 5,6 %, p = NS). Une réduction moyenne de 36,4 % du taux de PCR a été observée dans le groupe atorvastatine, contre une réduction de 5,2 % dans le groupe pravastatine (p < 0,0001).

Les résultats de l'étude ont été obtenus avec le dosage à 80 mg et ne peuvent donc pas être extrapolés aux dosages plus faibles.

Les profils de sécurité d'emploi et de tolérance ont été similaires entre les deux groupes de traitement.

Cette étude n'avait pas pour objectif d'évaluer l'effet d'un traitement hypolipémiant intensif sur la survenue des événements cardiovasculaires majeurs. La relation entre les résultats d'imagerie obtenus dans cette étude et l'efficacité clinique en termes de prévention primaire et secondaire des événements cardiovasculaires n'est pas établie.

#### *Syndrome coronarien aigu :*

Dans l'étude MIRACL, une dose de 80 mg d'atorvastatine a été évaluée chez 3086 patients (1538 patients dans le groupe atorvastatine ; 1548 patients dans le groupe placebo) présentant un syndrome coronarien aigu (infarctus du myocarde non à onde Q ou angor instable). Le traitement a été instauré au cours de la phase aiguë après hospitalisation et a été poursuivi pendant 16 semaines. Le traitement par atorvastatine 80 mg/jour a augmenté le temps de survenue du critère composite principal, qui combinait la survenue des décès de toute cause, des infarctus du myocarde non fatals, des arrêts cardiaques réanimés ou d'un angor avec signes d'ischémie myocardique nécessitant une hospitalisation. La réduction du risque a été de 16 % (p = 0,048). Ceci a été principalement dû à une réduction de 26 % des réhospitalisations pour angor avec signes d'ischémie du myocarde (p = 0,018). Les différences observées pour les critères secondaires n'étaient pas statistiquement significatifs (placebo : 22,2 %, atorvastatine : 22,4 %).

Le profil de la sécurité d'emploi de l'atorvastatine au cours de l'étude MIRACL était cohérent avec celui décrit à la rubrique Effets indésirables.

#### *Prévention de maladies cardiovasculaires :*

L'effet de l'atorvastatine sur les événements coronaires mortels et non mortels a été évalué dans une étude randomisée, en double aveugle contrôlée versus placebo, « the Anglo-Scandinavian Cardiac Outcomes Trial Lipid Lowering Arm » (ASCOT-LLA), chez des patients hypertendus



âgés de 40 à 79 ans, sans antécédent d'infarctus du myocarde ni d'angor traité, et présentaient des taux de CT  $\leq$  6,5 mmol/l (251 mg/dl). Tous les patients présentaient au moins 3 des facteurs de risque cardiovasculaire prédéfinis suivants : sexe masculin, âge ( $\geq$  55 ans), tabagisme, diabète, antécédent de coronaropathie chez un parent du premier degré, CT/HDL-C  $>$  6, artériopathie périphérique, hypertrophie ventriculaire gauche, antécédent d'accident vasculaire cérébral, anomalie électrocardiographique spécifique, protéinurie/albuminurie. Tous les patients inclus n'étaient pas considérés comme présentant un risque élevé de premier événement cardiovasculaire.

Les patients recevaient un traitement antihypertenseur à base d'amlodipine ou d'aténolol associé soit à 10 mg/jour d'atorvastatine (n = 5168) soit à un placebo (n = 5137).

| L'effet de l'atorvastatine sur la réduction du risque relatif et absolu a été :        |                                            |                                               |             |
|----------------------------------------------------------------------------------------|--------------------------------------------|-----------------------------------------------|-------------|
| <i>Événement</i>                                                                       |                                            |                                               |             |
| Réduction du risque relatif (%)                                                        | Nb d'événements (atorvastatine vs placebo) | Réduction du risque absolu <sup>(1)</sup> (%) | Valeur de p |
| <i>Décès d'origine coronaire et infarctus du myocarde non fatals :</i>                 |                                            |                                               |             |
| 36 %                                                                                   | 100 vs 154                                 | 1,1 %                                         | 0,0005      |
| <i>Total des événements cardiovasculaires et des procédures de revascularisation :</i> |                                            |                                               |             |
| 20 %                                                                                   | 389 vs 483                                 | 1,9 %                                         | 0,0008      |
| <i>Total des événements coronariens :</i>                                              |                                            |                                               |             |
| 29 %                                                                                   | 178 vs 247                                 | 1,4 %                                         | 0,0006      |

<sup>(1)</sup> Sur la base de la différence des taux d'événements survenus après une durée moyenne de suivi de 3,3 ans.

La diminution de la mortalité totale et cardiovasculaire n'était pas significative (185 versus 212 événements, p = 0,17 et 74 versus 82 événements, p = 0,51). Des analyses en sous-groupes en fonction du sexe (81 % d'hommes, 19 % de femmes) ont montré un bénéfice de l'atorvastatine chez les hommes mais pas chez les femmes ; ceci pouvant être expliqué peut-être par le faible nombre d'événements dans le groupe des femmes. La mortalité totale et cardiovasculaire était numériquement plus élevée dans le groupe des femmes (38 versus 30 et 17 versus 12), mais sans atteindre la significativité statistique. Une interaction significative en fonction du traitement antihypertenseur initial a été observée. L'atorvastatine diminue le nombre de « décès d'origine coronaire et IDM non fatal » (critère principal) chez les patients traités par amlodipine (HR 0,47 [0,32-0,69], p = 0,00008), contrairement à ceux traités par aténolol (HR 0,83 [0,59-1,17], p = 0,287).

L'effet de l'atorvastatine a également été évalué sur les événements cardiovasculaires mortels et non mortels dans l'étude Collaborative Atorvastatin Diabetes Study (CARDS). Il s'agit d'une étude randomisée, en double aveugle, multicentrique, contrôlée versus placebo réalisée chez des patients atteints de diabète de type 2, âgés de 40 à 75 ans, sans antécédents de maladies cardiovasculaires, présentant un taux de LDL-C  $\leq$  4,14 mmol/l (160 mg/dl) et un taux de TG  $\leq$  6,78 mmol/l (600 mg/dl).

Tous les patients avaient au moins 1 des facteurs de risque cardiovasculaire suivants : hypertension, tabagisme, rétinopathie, microalbuminurie ou macroalbuminurie.

Les patients recevaient soit 10 mg d'atorvastatine par jour (n = 1428) soit un placebo (n = 1410) pendant une période moyenne de 3,9 ans.

| L'effet de l'atorvastatine sur la réduction du risque relatif et absolu a été : |  |  |  |
|---------------------------------------------------------------------------------|--|--|--|
| <i>Événement</i>                                                                |  |  |  |

| Réduction du risque relatif (%)                                                                                                                                                     | Nb d'événements (atorvastatine vs placebo) | Réduction du risque absolu <sup>(1)</sup> (%) | Valeur de p |
|-------------------------------------------------------------------------------------------------------------------------------------------------------------------------------------|--------------------------------------------|-----------------------------------------------|-------------|
| <i>Événements cardiovasculaires majeurs (IDM aigu fatal et non fatal, IDM asymptomatique, décès d'origine coronaire aiguë, angor instable, PAC, ACTP, revascularisation, AVC) :</i> |                                            |                                               |             |
| 37 %                                                                                                                                                                                | 83 vs 127                                  | 3,2 %                                         | 0,0010      |
| <i>IDM (aigus fatal et non fatal, asymptomatique) :</i>                                                                                                                             |                                            |                                               |             |
| 42 %                                                                                                                                                                                | 38 vs 64                                   | 1,9 %                                         | 0,0070      |
| <i>Accidents vasculaires cérébraux (aigus fatal et non fatal) :</i>                                                                                                                 |                                            |                                               |             |
| 48 %                                                                                                                                                                                | 21 vs 39                                   | 1,3 %                                         | 0,0163      |

<sup>(1)</sup> Sur la base de la différence des taux d'événements survenus après une durée moyenne de 3,9 ans.

IDM : infarctus du myocarde ; PAC ; pontage aortocoronarien ; ACTP : angioplastie coronarienne transluminale percutanée.

Aucune différence de l'effet du traitement n'a été observée en fonction du sexe ou de l'âge des patients ou du taux de LDL-C à l'inclusion. Une tendance favorable a été observée sur la mortalité (82 décès dans le groupe placebo versus 61 dans le groupe atorvastatine, p = 0,0592).

#### *Récidive des accidents vasculaires cérébraux :*

Dans l'étude SPARCL (Stroke Prevention by Aggressive Reduction in Cholesterol Levels), l'effet de 80 mg d'atorvastatine ou d'un placebo sur la récurrence des AVC a été évalué chez 4731 patients ayant présenté un AVC ou un accident ischémique transitoire (AIT) au cours des 6 mois précédents et sans antécédents de cardiopathie coronarienne. 60 % des patients était des hommes, âgés de 21 à 92 ans (âge moyen : 63 ans) ayant des taux initiaux de LDL cholestérol de 133 mg/dl (3,4 mmol/l). Le taux moyen de LDL-C était de 73 mg/dl (1,9 mmol/l) sous atorvastatine et de 129 mg/dl (3,3 mmol/l) sous placebo. La durée moyenne du suivi était de 4,9 ans.

En comparaison à un placebo, 80 mg d'atorvastatine a diminué de 15 % le risque de survenue d'AVC mortel ou non mortel (critère principal), soit un risque relatif de 0,85 (intervalle de confiance à 95 % : 0,72-1,00 ; p = 0,05) ou de 0,84 (IC à 95 % : 0,71-0,99 ; p = 0,03) après ajustement en fonction des valeurs initiales. Le taux de mortalité (toutes causes confondues) était de 9,1 % (216/2365) chez les patients traités par atorvastatine versus 8,9 % (211/2366) chez les patients traités par placebo.

Une analyse réalisée a posteriori a montré que 80 mg d'atorvastatine diminuait la fréquence des accidents ischémiques de 9,2 % (218/2365) versus 11,6 % (274/2366) sous placebo (p = 0,01), et augmentait la fréquence des AVC hémorragiques de 2,3 % (55/2365) versus 1,4 % (33/2366) sous placebo (p = 0,02).

- Le risque d'AVC hémorragique était plus élevé chez les patients inclus ayant des antécédents d'AVC hémorragiques (7/45 sous atorvastatine versus 2/48 sous placebo), soit un risque relatif de 4,06 (intervalle de confiance à 95 % ou IC 95 % : 0,84-19,57). Le risque d'AVC ischémique était similaire dans les deux groupes (3/45 sous atorvastatine versus 2/48 sous placebo), soit un risque relatif de 1,64 (IC 95 % : 0,27-9,82).
- Le risque d'AVC hémorragique était plus élevé chez les patients inclus ayant des antécédents d'infarctus lacunaire (20/708 sous atorvastatine versus 4/701 sous placebo), soit un risque relatif de 4,99 (IC 95 % : 1,71-14,61). Le risque d'AVC ischémique était plus faible chez ces patients (79/708 sous atorvastatine versus 102/701 sous placebo) ; soit un risque relatif de 0,76 (IC 95 % : 0,57-1,02). Il est possible que le risque absolu

d'AVC soit plus élevé chez les patients traités par 80 mg d'atorvastatine par jour ayant un antécédent d'infarctus lacunaire.

Le taux de mortalité (toutes causes confondues) était de 15,6 % (7/45) sous atorvastatine versus 10,4 % (5/48) dans le sous-groupe de patients ayant un antécédent d'AVC hémorragique ; ce taux était de 10,9 % (77/708) sous atorvastatine versus 9,1 % (64/701) sous placebo dans le sous-groupe de patients ayant un antécédent d'infarctus lacunaire.

### **Population pédiatrique :**

#### *Hypercholestérolémie familiale hétérozygote chez les patients pédiatriques âgés de 6 à 17 ans :*

Une étude en ouvert de 8 semaines pour évaluer la pharmacocinétique, la pharmacodynamie, la sécurité et la tolérance de l'atorvastatine a été menée chez des enfants et des adolescents atteints d'une hypercholestérolémie familiale hétérozygote confirmée génétiquement et avec un taux initial de LDL-C  $\geq 4$  mmol/l. Un total de 39 enfants et adolescents, âgés de 6 à 17 ans, ont été inclus. La cohorte A a inclus 15 enfants âgés de 6 à 12 ans et étant au stade 1 de Tanner. La cohorte B a inclus 24 enfants âgés de 10 à 17 ans et étant à un stade de Tanner  $\geq 2$ .

La dose initiale d'atorvastatine était de 5 mg par jour sous forme de comprimé à croquer dans la cohorte A et de 10 mg par jour sous forme de comprimé dans la cohorte B. La dose d'atorvastatine pouvait être doublée si le sujet n'atteignait pas le taux cible de LDL-C  $< 3,35$  mmol/l à la semaine 4 et si l'atorvastatine était bien tolérée.

Les valeurs moyennes de LDL-C, Chol-T, VLDL-C et Apo B étaient diminuées à la semaine 2 chez tous les sujets. Pour les sujets chez qui la dose a été doublée, une diminution supplémentaire a été observée dès 2 semaines, lors de la première mesure suivant l'augmentation de dose. Les pourcentages moyens de diminution des paramètres lipidiques ont été similaires dans les deux cohortes, que les sujets soient restés à leur dose initiale ou qu'ils aient eu leur dose initiale doublée.

A la semaine 8, en moyenne, les pourcentages de modification par rapport aux taux initiaux de LDL-C et de Chol-T étaient d'environ 40 % et 30 %, respectivement, quelle que soit la dose.

#### *Hypercholestérolémie familiale hétérozygote chez les patients pédiatriques âgés de 10 à 17 ans :*

Dans une étude en double aveugle contrôlée contre placebo, suivie par une phase en ouvert, 187 garçons et filles postménarchie, âgés de 10 à 17 ans (âge moyen : 14,1 ans) présentant une hypercholestérolémie familiale hétérozygote (HF) ou une hypercholestérolémie sévère ont été randomisés et ont reçu soit de l'atorvastatine (n = 140) soit un placebo (n = 47) pendant 26 semaines puis ont tous reçu de l'atorvastatine pendant 26 semaines. La dose d'atorvastatine (une fois par jour) était de 10 mg pendant les 4 premières semaines puis a été augmentée à 20 mg si le taux de LDL-C était  $> 3,36$  mmol/l. L'atorvastatine a réduit significativement les taux plasmatiques de Chol-T, LDL-C, triglycérides et apolipoprotéine B au cours de la phase en double aveugle de 26 semaines. La valeur moyenne du LDL-C atteinte était de 3,38 mmol/l (intervalle : 1,81 - 6,26 mmol/l) dans le groupe atorvastatine et de 5,91 mmol/l (intervalle : 3,93 - 9,96 mmol/l) dans le groupe placebo durant la phase en double aveugle de 26 semaines.

Une étude pédiatrique supplémentaire évaluant l'atorvastatine versus le colestipol chez des patients atteints d'hypercholestérolémie âgés de 10 à 18 ans a démontré que l'atorvastatine (N = 25) a entraîné une réduction significative du LDL-C à la semaine 26 ( $p < 0,05$ ) par rapport au colestipol (N = 31).

Une étude d'usage compassionnel chez des patients atteints d'une hypercholestérolémie sévère (incluant l'hypercholestérolémie homozygote) a inclus 46 patients pédiatriques traités avec de

l'atorvastatine, la dose était adaptée en fonction de la réponse (certains sujets ont reçu 80 mg d'atorvastatine par jour). L'étude a duré 3 ans : le LDL-cholestérol a été diminué de 36 %. L'efficacité à long terme d'un traitement par atorvastatine pendant l'enfance afin de réduire la morbidité et la mortalité à l'âge adulte n'a pas été établie.

L'Agence Européenne du Médicament a levé l'obligation de soumettre les résultats d'études avec de l'atorvastatine chez des enfants âgés de 0 à moins de 6 ans dans le traitement de l'hypercholestérolémie hétérozygote et chez les enfants âgés de 0 à moins de 18 ans dans le traitement de l'hypercholestérolémie familiale homozygote, de l'hypercholestérolémie mixte, de l'hypercholestérolémie primaire et de la prévention des événements cardiovasculaires (cf Posologie et Mode d'administration pour les informations relatives à l'utilisation pédiatrique).

## **PP PHARMACOCINÉTIQUE** [\(début page\)](#)

### *Absorption :*

Après administration orale, l'atorvastatine est rapidement absorbée, les concentrations plasmiqes maximales (C<sub>max</sub>) étant atteintes en 1 à 2 heures.

L'importance de l'absorption de l'atorvastatine est dose-dépendante.

Après administration orale, la biodisponibilité des comprimés pelliculés d'atorvastatine est de 95 % à 99 % en comparaison à une solution orale.

La biodisponibilité absolue de l'atorvastatine est d'environ 12 % ; la biodisponibilité systémique de l'activité inhibitrice de l'HMG-CoA réductase étant d'environ 30 %.

La faible biodisponibilité systémique est due à la clairance dans la muqueuse gastro-intestinale précédant le passage systémique et à l'effet de premier passage hépatique.

### *Distribution :*

Le volume moyen de distribution de l'atorvastatine est d'environ 381 litres. La liaison de l'atorvastatine aux protéines plasmatiques est  $\geq 98$  %.

### *Biotransformation :*

L'atorvastatine est métabolisée par le cytochrome P450 3A4 en dérivés ortho- et parahydroxylés et en divers produits de bêta-oxydation. En plus d'autres voies métaboliques, ces produits sont ultérieurement métabolisés par glucuronidation. L'inhibition in vitro de l'HMG-CoA réductase par les métabolites ortho- et parahydroxylés est similaire à celle de l'atorvastatine. Environ 70 % de l'activité circulante inhibitrice de l'HMG-CoA réductase est attribuée aux métabolites actifs.

### *Élimination :*

L'atorvastatine est principalement éliminée par voie biliaire après métabolisme hépatique et/ou extra-hépatique. Cependant, l'atorvastatine ne semble pas subir un cycle entérohépatique important. La demi-vie d'élimination plasmatique moyenne de l'atorvastatine est d'environ 14 heures chez l'homme. La demi-vie de l'activité d'inhibition de l'HMG-CoA réductase est d'environ 20 à 30 heures en raison de la contribution des métabolites actifs.

### *Populations particulières :*

- **Sujet âgé :**  
Les concentrations plasmatiques de l'atorvastatine et de ses métabolites actifs sont plus élevées chez le sujet âgé sain que chez l'adulte jeune sain, l'effet hypolipémiant étant cependant comparable à celui observé chez des patients plus jeunes.
- **Population pédiatrique :**  
Dans une étude en ouvert de 8 semaines, des patients pédiatriques (âgés de 6 à 17 ans) étant au stade 1 de Tanner (N = 15) ou à un stade de Tanner  $\geq 2$  (N = 24), atteints

d'hypercholestérolémie familiale hétérozygote et présentant un LDL-C initial  $\geq 4$  mmol/l ont été traités respectivement avec 5 ou 10 mg d'atorvastatine sous forme de comprimé à croquer ou 10 ou 20 mg d'atorvastatine sous forme de comprimé pelliculé, une fois par jour. Le poids corporel a été la seule covariable significative dans le modèle pharmacocinétique de la population de l'atorvastatine. La clairance apparente après administration orale de l'atorvastatine chez les sujets pédiatriques est apparue similaire à celle des adultes après mise à l'échelle allométrique par le poids corporel. Une diminution constante du LDL-C et du Chol-T a été observée, quelle que soit l'exposition à l'atorvastatine et à l'o-hydroxyatorvastatine.

- Sexe :  
Les concentrations de l'atorvastatine et de ses métabolites actifs sont différentes entre les femmes et les hommes (chez les femmes : Cmax environ 20 % plus élevée et SSC environ 10 % plus basse). Ces différences n'ont pas de signification clinique, aucune différence cliniquement significative sur les paramètres lipidiques n'étant observée entre les hommes et les femmes.
- Patients atteints d'insuffisance rénale :  
L'insuffisance rénale n'a pas d'influence sur les concentrations plasmatiques ou sur l'effet de l'atorvastatine et de ses métabolites actifs sur les paramètres lipidiques.
- Patients atteints d'insuffisance hépatique :  
Les concentrations plasmatiques d'atorvastatine et de ses métabolites actifs sont très augmentées (environ 16 fois pour la Cmax et environ 11 fois pour la SSC) chez des patients présentant une insuffisance chronique due à l'alcool (classe B de Child-Pugh).
- Polymorphisme SLCO1B1 :  
Le captage hépatique de tous les inhibiteurs de l'HMG-CoA réductase, dont l'atorvastatine, implique le transporteur OATP1B1. Chez les patients ayant un polymorphisme SLCO1B1, il y a un risque de surexposition à l'atorvastatine, qui peut entraîner une augmentation du risque de rhabdomyolyse (cf Mises en garde et Précautions d'emploi). Un polymorphisme au niveau du gène OATP1B1 (SLCO1B c.521CC) est associé à une exposition à l'atorvastatine 2,4 fois (SSC) supérieure à celle observée chez les individus sans ce variant génotypique (c.521TT). Une altération génétique du captage hépatique de l'atorvastatine est également possible chez ces patients. Les conséquences éventuelles sur l'efficacité sont inconnues.

## **PP** SÉCURITE PRÉCLINIQUE [\(début page\)](#)

Aucun effet mutagène ou clastogène potentiel n'a été observé avec l'atorvastatine dans 4 tests in vitro et 1 test in vivo. L'atorvastatine n'a pas montré d'effet carcinogène chez le rat, mais de fortes doses chez la souris (conduisant à une SSC<sub>0-24 h</sub> 6 à 11 fois supérieure à celle observée chez l'homme aux doses recommandées les plus élevées) ont été associées à des adénomes hépatocellulaires chez les mâles et à des carcinomes hépatocellulaires chez les femelles.

Il a été montré lors d'études chez l'animal que les inhibiteurs de l'HMG-CoA réductase peuvent affecter le développement de l'embryon ou du fœtus. Chez le rat, le lapin et le chien, l'atorvastatine n'a exercé aucun effet sur la fécondité et n'a pas été tératogène mais une toxicité foetale a été observée chez le rat et le lapin à des doses toxiques pour les mères. Un retard du développement des portées et une réduction de la survie postnatale ont été observés au cours d'expositions à une dose élevée d'atorvastatine chez la rate. Des données ont indiqué un transfert transplacentaire chez la rate. Les

concentrations de l'atorvastatine dans le plasma et le lait ont été similaires chez la rate. On ne sait pas si l'atorvastatine ou ses métabolites sont excrétés dans le lait maternel.

## **DP MODALITÉS DE CONSERVATION** [\(début page\)](#)

*Durée de conservation :*

- Comprimé pelliculé : 3 ans.
- Comprimé à croquer : 2 ans.

Pas de précautions particulières de conservation.

## **DP MODALITÉS MANIPULATION/ÉLIMINATION** [\(début page\)](#)

Pas d'exigences particulières.

## **PRESCRIPTION/DÉLIVRANCE/PRISE EN CHARGE** [\(début page\)](#)

LISTE I

AMM 3400934306754 (1997) 28 cp pellic 10 mg.  
3400956030224 (1997) 50 cp pellic 10 mg.  
3400937199216 (2005) 90 cp pellic 10 mg.  
3400949458783 (2010) 30 cp à croquer 10 mg.  
3400934306815 (1997) 28 cp pellic 20 mg.  
3400956030453 (1997) 50 cp pellic 20 mg.  
3400937199384 (2005) 90 cp pellic 20 mg.  
3400949458844 (2010) 30 cp à croquer 20 mg.  
3400934306983 (1997) 28 cp pellic 40 mg.  
3400956030682 (1997) 50 cp pellic 40 mg.  
3400937199445 (2005) 90 cp pellic 40 mg.  
3400935557506 (2000) 28 cp pellic 80 mg.  
3400935557674 (2000) 50 cp pellic 80 mg.  
3400937199506 (2005) 90 cp pellic 80 mg.

RCP révisés le 12.03.2014.

**Prix :** 14,10 euros (28 comprimés pelliculés à 10 mg).  
15,07 euros (30 comprimés à croquer à 10 mg).  
44,19 euros (90 comprimés pelliculés à 10 mg).  
14,10 euros (28 comprimés pelliculés à 20 mg).  
15,07 euros (30 comprimés à croquer à 20 mg).  
44,19 euros (90 comprimés pelliculés à 20 mg).  
14,10 euros (28 comprimés pelliculés à 40 mg).  
44,19 euros (90 comprimés pelliculés à 40 mg).  
14,10 euros (28 comprimés pelliculés à 80 mg).

44,19 euros (90 comprimés pelliculés à 80 mg).

Remb Séc soc à 65 %.

Collect (sauf 90 cp pellic à 10 mg, 20 mg, 40 mg, 80 mg).

Modèles hospitaliers : Collect.

**PFIZER**

23-25, av du Dr-Lannelongue. 75014 Paris

Tél : 01 58 07 30 00

Info médic : Tél : 01 58 07 34 40

## **ANNEX 7 : Curriculum Vitae of the two principal investigators**

### **Thierry PASSERON**

Date of birth: June 2<sup>nd</sup> 1972 at Antibes. Alpes Maritimes (06). Married, two children.

Address: \_ home: 150 Chemin du Trier. 06790 Aspremont.

\_ work: Department of Dermatology, Archet 2 hospital, BP 3079, 151, rte de St-Antoine de Ginestière. 06202 Nice cedex 3.

N° ADELI : 06 11 1190 2 / N° Conseil de l'Ordre : 11190

### **UNIVERSITY QUALIFICATION**

- \_ University degree of the surgical and medical use of lasers. 1999, Nîmes/Montpellier University
- \_ University degree of Tropical Medicine, 2000, Marseille University
- \_ Master's degree: Biological and medical sciences, 1998, Nice – Sophia-Antipolis University
- \_ Master 2 degree. Biology and Pharmacology of the skin, 2002, Paris VII University and INSERM U385.
- \_ Medical Thesis (MD). 2003, Nice – Sophia-Antipolis University. Thesis : « Use of 308nm laser in dermatology »
- \_ Pass the entrance examination for specialized medical field 2003, Nice – Sophia-Antipolis University
- \_ Gold medal of Nice hospitals, Medical section. 2003
- \_ Fellowship in the laboratory of Dr. Vincent J. Hearing at the National Institute of Health, National Cancer Institute. 2005 – 2007.
- \_ Science Thesis (PhD), 2008 . Nice – Sophia-Antipolis University. Thesis : « From melanocytes to melanoma: the crucial role of SOX9 in melanocytic cells ». Nomination for the Price of best thesis of 2008 in Nice – Sophia-Antipolis University.
- \_ “Habilitation à diriger les recherches”, 2009. Nice – Sophia-Antipolis University.
- \_ Professor in Dermatology: 2010
- \_ Head of the INSERM U1065 team 12, C3M: 2012

### **HOSPITAL QUALIFICATION**

- \_ Intern of Medicine 1996.
- \_ Assistant professor in Principal Hospital of Dakar (Senegal) 2000-2001
- \_ Clinical assistant (Department of Dermatology, University Hospital of Nice) 2003-2005
- \_ Hospital Practitioner (Department of Dermatology, University Hospital of Nice) since November 2007

### **SCIENTIFIC SOCIETIES**

- \_ Member of the French Society of Dermatology since 2004
- \_ Member of the French Society for Research in Dermatology since 2004
- \_ Elected Member of the board of the French Group of Laser of the French Society of Dermatology since 2004
- \_ Member of the European Task Force for Vitiligo since 2004
- \_ Expert for the French Drug Agency (ANSM) from 2007 to 2009
- \_ Member of the American Society for Laser Medicine and Surgery since 2009
- \_ Member of the international board of the American Society for Laser Medicine and Surgery since 2011
- \_ Member of the European Society for Pigment Cell Research since 2009
- \_ Member of the European Academy of Dermatology and Venereology since 2009
- \_ Assistant Editor of the European Academy of Dermatology and Venereology from 2009 to 2014
- \_ Member of the European Society for Dermatological Research since 2014

### **PRIZES AND GRANTS**

- \_ 2003 Grant for young researcher of the University Hospital of Nice
- \_ 2003 Grant of the French Society of Dermatology
- \_ 2003 2<sup>nd</sup> price of the best laser article of the year (European Academy of Dermatology and Venereology 2003)
- \_ 2003 Best laser poster (Journées Dermatologiques de Paris 2003)
- \_ 2003 Best poster, all field (Journées Dermatologiques de Paris 2003)
- \_ 2004 2<sup>nd</sup> price RoC Dermatologic Innovation 2004 (Journées Dermatologiques de Paris 2004)
- \_ 2004 Grant : « Amis de la Faculté de Médecine de Nice »
- \_ 2003 Grant of the French Society of Dermatology for the American Academy of Dermatology 2003
- \_ 2005 Grant of the « Fondation Philippe »
- \_ 2005 Grant Lavoisier of the French Minister of Foreign Affairs
- \_ 2008 Price Charles Grupper
- \_ 2009 Grant INCa
- \_ 2009 Grant from the French Society for Dermatological Research
- \_ 2009 Grant from the French Society of Dermatology
- \_ 2010 Grant from the 'Association pour la Recherche sur le Cancer'
- \_ 2010 Price Robert Degos
- \_ 2011 IMCAS Award
- \_ 2011 Grant from the French Society of Dermatology
- \_ 2011 INSERM Atip-AVENIR
- \_ 2012 Grant Phyto Solba
- \_ 2013 Grant from the French Society of Dermatology
- \_ 2014 PHRC regional

### **PATENTS**

- \_ Regulation of Skin Pigmentation/Thickness by Dickkopf 1 (DKK1) - V.J. Hearing, Y. Yamaguchi and T. Passeron (co-inventors), #4239-76866-01.
- \_ Regulation of Melanocyte and Melanoma cell Differentiation (Including Pigmentation) and Proliferation by SOX9 – V.J. Hearing, T. Passeron (co-inventors); # E-150-2007/0-US-01.
- \_ Compositions and methods for inducing senescence in cancer cells. T. Passeron, E Le Pape, GM De Donatis (co-inventors) (#EP 13 306 200.0)

### **GOOD CLINICAL PRACTICE TRAINING**

Received at investigator meetings

### **PUBLICATIONS AND CLINICAL TRIALS**



Investigator or co-investigator in more than 40 clinical trials.  
More than 120 publications in scientific journals. H index: 24

Nice, October the 26<sup>th</sup> 2014

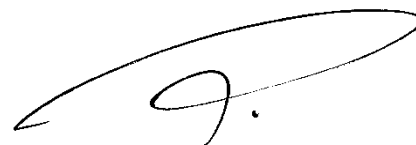A handwritten signature in black ink, consisting of a large, sweeping loop followed by a smaller, more intricate flourish.

## Etiquette

L'étiquetage des produits sera conforme à la Loi du 09 Août 2004 du Code de la Santé Publique, arrêté du 24 mai 2006 fixant le contenu de l'étiquetage des médicaments expérimentaux et au Guide des Bonnes Pratiques Cliniques.

Cet étiquetage sera réalisé par la pharmacie de chaque site investigateur.

Le modèle d'étiquette comporte:

- CHU de Nice, 4, avenue Reine Victoria - 06000 Nice. Tél : 04 92 03 40 11
- Pr Passeron - Protocole 15-AOI-01
- Service de Dermatologie - Centre n°1
- Numéro EudraCT: 2014-005718-42
- TAHOR® atorvastatine comprimé pelliculé à 10 mg ou 20mg ou 40 mg ou 80 mg – 40 mg pendant 1 mois, puis 80 mg pendant 5 mois –Voie orale
- Numéro de lot : \_\_\_\_\_
- Date limite de péremption (MM/YYYY) : \_\_\_\_\_
- Pas de conservation particulière
- Mode d'utilisation : se référer à la notice d'utilisation
- Pour recherche biomédicale uniquement
- Ne pas laisser à la portée des enfants

Name **Steven Thng**  
Title Senior Consultant  
NRIC/Passport No. S6824346G  
Office Mailing Address 1 Mandalay Road S308205  
Email sthngs@singnet.com.sg  
Contact No +65 81253990  
Current Position Senior Consultant & Adj Assoc Prof  
Percentage of time spent in Singapore every year:- 90%  
Academic qualifications Edinburgh, MRCP (UK), 1996  
NUS, MBBS, 1992

Research interests Vitiligo: Classification, pathogenesis and treatment  
Melasma: Pathogenesis and treatment  
Advanced drug delivery system for dermatological applications.

Selected publications in the last 5 years

1. Investigating factors associated with depression of vitiligo patients in Singapore  
Cham MF, Chua TL,, Goh BK, Thng TG  
J clinical Nursing. Jul 2011; 1365-2012.
2. Periorbital Hyperpigmentation in Asians. A epidemiologic study and a proposed classification.  
Ranu H, Thng S, CL Goh.  
Dermatol Surg. June 2011. doi: 10.1111/j.1524-4725.2011.02065
3. Personalised medicine for psoriasis:- A real possibility ahead. Ann Academy of Medicine Singapore. TG  
Thng, KS Lim. Ann Acad Singapore. Aug 2010. 588-590.

Patents

TD 268/14 Targeting Of Melanocytes for Delivering Therapeutics Using Protein Nanocages

Scientific Awards

- 1) NHG Clinician Investigator Award Nov 2014.

Current and previous support from NMRC or other sources

1. Protein nanocages for treatment of hyperpigmentary disorders. NHG-NTU-ASTAR Skin Thematic Grant  
\$500,000
2. Digital Image Analysis to quantify severity of melasma through analysis of digital photographs NHG-  
NTU-ASTAR Skin Thematic Grant \$100,000
3. Multimodal imaging and mRNA expression study into the pathogenesis of melasma. NHG-NTU-ASTAR  
Skin Thematic Grant \$100,000
4. A double blind placebo trial on use of alpha-MSH for the treatment of Vitiligo Vulgaris. Pharma  
\$500,000
5. Targetted therapy for melasma NTU tier 1 grant\$100,000
6. Advanced drug delivery system for dermatological use. NTU \$150,000



Dr Steven Thng  
5th Nov 2014

Liste des investigateurs

Pr Passeron Service de Dermatologie - CHU de Nice  
Dr Steven Thng - Singapour

Collaborateurs

Sophie Nguyen - Service de Dermatologie - CHU de Nice
